# Supplementary material for: Autophagy regulates fatty acid availability for oxidative phosphorylation through mitochondria-endoplasmic reticulum contact sites
Source: PubMed Central journal article supplement (PMC7426880; doi:10.1038/s41467-020-17882-2), 2020-08-13

## **Supplementary Information**

### **Autophagy regulates fatty acid availability for oxidative phosphorylation through mitochondria-endoplasmic reticulum contact sites**

**Bosc<sup>\*</sup>, Broin<sup>\*</sup> et al.**

#### **Table of Contents :**

- Supplementary Tables 1 - 5**
- Supplementary Figures 1-8**

## Supplementary Tables



| ID study      | Sexe       | Karyotype | Cytogenetic risk group                                            | FAB | FLT3 statut<br>(ITD 0/1) | IDH statut |      | NPM1 statut | DNMT3A statut | CEBP $\alpha$ statut | P53 statut |    |
|---------------|------------|-----------|-------------------------------------------------------------------|-----|--------------------------|------------|------|-------------|---------------|----------------------|------------|----|
|               | (M=1, F=2) |           |                                                                   |     |                          | IDH1       | IDH2 |             |               |                      |            |    |
|               |            |           | Infavorable: 0<br>Intermediate: 1<br>Favorable: 2                 |     |                          | 0/1        | 0/1  | 0/1         | 0/1           | 0/1                  | 0/1        |    |
| Primary cells | LAI        | 1         | 47,XY,inv(16)(p13q22),+22<15>/46,XY<1>                            | 2   | 4                        | 0          | 0    | 0           | 0             | 0                    | 0          | ND |
|               | GAR        | 1         | 47,XY,+8<11>/46,XY<9>                                             | 1   | 4                        | 0          | ND   | ND          | 0             | ND                   | 0          | ND |
|               | MAR        | 2         | 46,XX<20>                                                         | 1   | 1                        | 0          | 0    | 0           | 1             | 1                    | 0          | ND |
|               | MALO       | 2         | 46,XX<20>                                                         | 1   | 1                        | 1          | 0    | 0           | 1             | 1                    | 0          | 0  |
|               | FEG        | 1         | 47,XY,inv(16)(p13q22),+22<20>                                     | 2   | 4                        | ND         | ND   | ND          | ND            | ND                   | ND         | ND |
|               | AUB        | 1         | 46,XY<20>                                                         | 1   | 4                        | 1          | 0    | 0           | 1             | 1                    | 0          | ND |
|               | AUB        | 1         | 46,XY<20>                                                         | 1   | 1                        | 1          | 0    | 0           | 1             | 1                    | 0          | 0  |
|               | LOP        | 1         | 46,XX<20>                                                         |     |                          | 1          | ND   | ND          | 0             | 0                    | ND         | ND |
|               | ZEG        | 2         | 46,XX,del(5)(p15p13),add(6)(q2?5),add(14)(q3?2)<17>/46,XX<4>      | 0   | 1                        | 1          | ND   | ND          | 0             | ND                   | ND         | ND |
|               | LAMA       | 2         | 46,XX,der(5)t(5;14)(q13;q12),der(14)t(5;14)(q15;q12)[2]/46,XX[18] |     |                          |            |      |             |               |                      |            |    |
|               | LOP        | 1         | 47,XY,+8,inv(16)(p13q22)<20>                                      | 2   |                          |            |      |             |               |                      |            |    |
|               | SAGE       | 2         | 46,XX<20>                                                         | 1   | 5                        | 0          | 0    | 0           | 1             | 1                    | 0          | 0  |
|               | ELLUL      | 1         | 46,XY<20>                                                         | 1   | 4                        | 1          | 0    | 0           | 0             | 0                    | 0          | 0  |
|               | BOMA       | 2         | Echec                                                             | NA  | 2                        | 1          | 0    | 0           | 1             | ND                   | ND         | ND |
|               | DELA       | 2         | 46,XX<20>                                                         | 1   | 4                        | 1          | 0    | 0           | 1             | 0                    | 0          | 0  |
|               | BES        | 2         | t(9;22)                                                           | 0   | 6                        | 0          | 0    | 0           | 1             | 0                    | 0          | ND |
|               | PRA        | 2         | complex                                                           | 0   | 2                        | 0          | 0    | 0           | 0             | 0                    | 0          | 1  |
|               | FRE        | 1         | 46,XY<20>                                                         | 1   | 5                        | 0          | 1    | 0           | 1             | 1                    | 0          | ND |
|               | LAS        | 1         | 46,XY<20>                                                         | 1   | 2                        | 0          | 0    | 0           | 1             | 0                    | 0          | ND |
| BOUMA         | 2          | 46,XX<20> | 1                                                                 | 4   | 1                        | ND         | ND   | 1           | ND            | ND                   | ND         |    |
| Cell lines    | MOLM14     | 1         | complex                                                           |     | 5                        | 1          | 0    | 0           | 0             | 0                    | 0          | 0  |
|               | U937       | 1         | t(10;11)(p13;q14)                                                 |     | 5                        | 0          | 0    | 0           | 0             | 0                    | 0          | 1  |

**Supplementary Table 1. Primary and AML cell line characteristics**

| Sample type             | From          | Birth date | Immatriculation | Sexe | Cell isolation |
|-------------------------|---------------|------------|-----------------|------|----------------|
| <b>Cord blood</b>       | EFS, Besançon | 24/09/2019 | 64195204962     | M    | CD34+          |
| <b>Cord blood</b>       | EFS, Besançon | 23/09/2019 | 64195204989     | F    | CD34+          |
| <b>Cord blood</b>       | EFS, Besançon | 04/11/2019 | 6419550633 8    | M    | CD34+          |
| <b>Cord blood</b>       | EFS, Besançon | 04/11/2019 | 6419520582 6    | F    | CD34+          |
| <b>Cord blood</b>       | EFS, Besançon | 25/11/2019 | 6419550675 -    | F    | CD34+          |
| <b>Cord blood</b>       | EFS, Besançon | 25/11/2019 | 6419550627 4    | M    | CD34+          |
| <b>Cord blood</b>       | EFS, Besançon | 02/12/2019 | 6419530546 4    | F    | CD34+          |
| <b>Cord blood</b>       | EFS, Besançon | 02/12/2019 | 6419550684 8    | M    | CD34+          |
| <b>Cord blood</b>       | EFS, Besançon | 10/12/2019 | 6419550697 9    | M    | CD34+          |
| <b>Cord blood</b>       | EFS, Besançon | 10/12/2019 | 6419520647 4    | M    | CD34+          |
| <b>Cord blood</b>       | EFS, Besançon | 17/12/2019 | 6419550712 -    | F    | CD34+          |
| <b>Cord blood</b>       | EFS, Besançon | 16/12/2019 | 6419520662 6    | F    | CD34+          |
| <b>Peripheral blood</b> |               |            |                 |      |                |
| 11 samples              | EFS, Toulouse |            |                 |      | PBMC           |

**Supplementary Table 2. Healthy donor characteristics**

| MOLM14 METF vs CTL UP |      |         | MOLM14 METF vs CTL DOWN |      |         | U937 METF vs CTL UP |      |         | U937 METF vs CTL DOWN |      |         |
|-----------------------|------|---------|-------------------------|------|---------|---------------------|------|---------|-----------------------|------|---------|
| Genes                 | FC   | p value | Genes                   | FC   | p value | Genes               | FC   | p value | Genes                 | FC   | p value |
| RRP7B                 | 2.5  | 0.037   | TBC1D30                 | 0.27 | 0       | LOC284561           | 5.21 | 0.001   | INSIG1                | 0.23 | 0       |
| ULBP1                 | 2.4  | 0.005   | TXNIP                   | 0.32 | 0.007   | SLC7A11             | 4.1  | 0.029   | SNAR-E                | 0.25 | 0       |
| CTH                   | 2.39 | 0       | VNN1                    | 0.4  | 0.006   | SES2                | 3.57 | 0.005   | LDLR                  | 0.31 | 0.007   |
| JHDM1D                | 2.25 | 0.001   | MPO                     | 0.4  | 0.001   | DDIT4               | 3.29 | 0.002   | IL8                   | 0.32 | 0.002   |
| IL31RA                | 2.17 | 0.006   | LOC100505613            | 0.42 | 0.004   | TUBE1               | 3.13 | 0       | TARP                  | 0.38 | 0       |
| ATF5                  | 2.16 | 0.004   | MNDA                    | 0.43 | 0.015   | MIR628              | 3.05 | 0.049   | SNAR-B1               | 0.39 | 0.001   |
| TUBE1                 | 2.14 | 0       | RN5S141                 | 0.43 | 0       | DDIT3               | 3.03 | 0       | MSMO1                 | 0.41 | 0.001   |
| SLC6A9                | 2.05 | 0.006   | INSIG1                  | 0.45 | 0.003   | LOC374443           | 2.79 | 0       | SDF2L1                | 0.41 | 0.002   |
| TRIB3                 | 1.92 | 0.001   | TMEM45A                 | 0.45 | 0.02    | RRP7B               | 2.79 | 0.002   | HSPA1B                | 0.41 | 0       |
| MIR153-2              | 1.86 | 0.002   | MYBPH                   | 0.46 | 0.006   | CTH                 | 2.53 | 0.003   | MIR3676               | 0.41 | 0.007   |
| FLJ46906              | 1.85 | 0.001   | TARP                    | 0.46 | 0.001   | ULBP1               | 2.49 | 0.046   | GPR84                 | 0.42 | 0.005   |
| ME1                   | 1.81 | 0.001   | ADAMTS1                 | 0.48 | 0.003   | IL31RA              | 2.42 | 0.008   | HSPA1A                | 0.42 | 0.006   |
| P2RX7                 | 1.81 | 0.008   | ANXA1                   | 0.48 | 0.001   | ZC3H6               | 2.4  | 0.013   | RAB39A                | 0.44 | 0.035   |
| GNG7                  | 1.8  | 0.001   | STS                     | 0.49 | 0       | P2RX7               | 2.18 | 0.006   | IPCEF1                | 0.44 | 0       |
| ZNF643                | 1.79 | 0.045   | HIST1H2AB               | 0.5  | 0.024   | ASNS                | 2.15 | 0.005   | FASN                  | 0.45 | 0.006   |
| RASA4                 | 1.78 | 0.056   | LOC642934               | 0.5  | 0.016   | CAB39L              | 2.1  | 0.007   | SPRR2F                | 0.45 | 0.004   |
| FLJ35024              | 1.77 | 0.001   | CHCHD7                  | 0.51 | 0.003   | PSAT1               | 2.1  | 0.002   | ECRP                  | 0.46 | 0.002   |
| IGANRP                | 1.74 | 0.022   | HIST1H2BG               | 0.52 | 0.01    | HCK                 | 2.07 | 0.004   | DHCR24                | 0.46 | 0.002   |
| SERPINI2              | 1.73 | 0.013   | E2F8                    | 0.54 | 0.003   | TSEN15              | 2.02 | 0.002   | SNORD14E              | 0.46 | 0.014   |
| C5orf28               | 1.72 | 0.001   | CCR2                    | 0.55 | 0.019   | CCDC146             | 1.96 | 0.023   | SNAR-D                | 0.47 | 0.025   |
| HEATR5A               | 1.71 | 0.012   | PCED1B-AS1              | 0.55 | 0.005   | WARS                | 1.92 | 0.006   | HSPA8                 | 0.48 | 0.002   |
| SLC7A11               | 1.71 | 0.003   | FADS1                   | 0.57 | 0.038   | FBXO10              | 1.92 | 0.001   | HMGCS1                | 0.48 | 0       |
| OC10050696            | 1.7  | 0.019   | LOC100506394            | 0.57 | 0.007   | SPG11               | 1.91 | 0.01    | DNAJA1                | 0.48 | 0.001   |
| NHSL1                 | 1.69 | 0.009   | IRS2                    | 0.57 | 0.004   | VLDLR               | 1.87 | 0.002   | CCL2                  | 0.49 | 0.002   |
| OC10012828            | 1.67 | 0.01    | E2F7                    | 0.57 | 0.007   | ERN1                | 1.84 | 0.003   | RNU12                 | 0.5  | 0.001   |
| CCDC146               | 1.66 | 0.001   | MIR181B1                | 0.57 | 0.006   | GARS                | 1.84 | 0.003   | HMGCR                 | 0.5  | 0       |
| DDIT4                 | 1.66 | 0.003   | C19orf59                | 0.58 | 0.001   | AARS                | 1.84 | 0       | POP1                  | 0.51 | 0.004   |
| MIR628                | 1.66 | 0.002   | GDAP1                   | 0.58 | 0.006   | SOS2                | 1.83 | 0.001   | MIR4521               | 0.51 | 0.04    |
| OC10013015            | 1.65 | 0.015   | HIST1H3J                | 0.58 | 0.004   | CLIC4               | 1.81 | 0       | CY5D1                 | 0.52 | 0.035   |
| SNORD96B              | 1.64 | 0.009   | GPR183                  | 0.58 | 0       | LOC389765           | 1.81 | 0.009   | SNAR-C1               | 0.52 | 0.001   |
| SARS                  | 1.64 | 0.002   | TK1                     | 0.59 | 0.004   | FRA10AC1            | 1.81 | 0.034   | CYP51A1               | 0.52 | 0       |
| SES2                  | 1.64 | 0.007   | DHCR24                  | 0.6  | 0       | EDEM2               | 1.8  | 0.029   | ANKRD22               | 0.53 | 0       |
| PPP1R11               | 1.62 | 0.031   | SLPI                    | 0.6  | 0.007   | PDCD4               | 1.78 | 0.009   | MIR221                | 0.53 | 0.003   |
| PSAT1                 | 1.62 | 0       | GIN2                    | 0.6  | 0.001   | VEGFA               | 1.78 | 0       | TSR2                  | 0.53 | 0.011   |
| VEGFA                 | 1.61 | 0.001   | FCGR2B                  | 0.61 | 0.027   | ANKRA2              | 1.78 | 0.036   | CCNE2                 | 0.54 | 0.01    |
| PAG1                  | 1.61 | 0.029   | NAV3                    | 0.61 | 0.008   | DNAJC5B             | 1.78 | 0.001   | SQLE                  | 0.54 | 0.001   |
| DDIT3                 | 1.6  | 0.001   | HSD11B1                 | 0.61 | 0       | HPS4                | 1.77 | 0.001   | CLEC4D                | 0.55 | 0.034   |
| STC2                  | 1.6  | 0.02    | KIF20A                  | 0.62 | 0.002   | PLK1S1              | 1.76 | 0       | SNAR-H                | 0.55 | 0.002   |
| FBXL20                | 1.59 | 0.004   | CABLES2                 | 0.62 | 0.024   | RPS6KA2-IT1         | 1.76 | 0.001   | STRA13                | 0.55 | 0.016   |
| CYP2B7P1              | 1.59 | 0.007   | SDF2L1                  | 0.63 | 0.03    | RPS6KA2             | 1.76 | 0.005   | STAR4                 | 0.55 | 0.013   |
| RN55465               | 1.57 | 0.001   | ARRB2                   | 0.63 | 0       | ACACB               | 1.76 | 0.005   | SF3B5                 | 0.55 | 0       |
| TMEM63A               | 1.56 | 0.004   | ACPP                    | 0.63 | 0.01    | JHDM1D              | 1.75 | 0.012   | GPRIN3                | 0.55 | 0.017   |
| C5orf56               | 1.56 | 0.026   | CSF1R                   | 0.63 | 0.005   | CTSO                | 1.75 | 0.043   | LCMT2                 | 0.55 | 0.044   |
| CRYM-AS1              | 1.55 | 0.015   | HSD17B7                 | 0.64 | 0.007   | HSD17B13            | 1.74 | 0.006   | JUN                   | 0.56 | 0.024   |
| PLXNA1                | 1.55 | 0.033   | MS4A3                   | 0.64 | 0.002   | SENP7               | 1.73 | 0.037   | PCNA-AS1              | 0.56 | 0.003   |
| SYCP2                 | 1.55 | 0.017   | NAB2                    | 0.64 | 0.045   | VAMP4               | 1.73 | 0.012   | HSPH1                 | 0.56 | 0       |
| ASNS                  | 1.54 | 0       | S100A8                  | 0.64 | 0.002   | DNASE2              | 1.72 | 0.019   | TRGV10                | 0.56 | 0.01    |
| IFIH1                 | 1.54 | 0.011   | LDLR                    | 0.64 | 0.023   | ZMAT1               | 1.71 | 0.013   | CCNE1                 | 0.56 | 0.001   |
| ALDH1L2               | 1.54 | 0       | PCED1B                  | 0.64 | 0.001   | ITGAL               | 1.71 | 0.001   | TNFRSF12A             | 0.57 | 0.028   |
| LRP5                  | 1.54 | 0.001   | PGBD5                   | 0.64 | 0.021   | KCNE1               | 1.71 | 0.002   | MFS2D1                | 0.57 | 0.028   |
| IRF1                  | 1.54 | 0       | RRM2                    | 0.64 | 0.001   | TNFRSF14            | 1.69 | 0.006   | GIN2                  | 0.57 | 0       |
| OC10050667            | 1.54 | 0.011   | HIST1H2BM               | 0.64 | 0.017   | OC10050700          | 1.69 | 0.045   | TREM1                 | 0.57 | 0.004   |
| ZP3                   | 1.54 | 0.005   | FOXA1                   | 0.64 | 0.014   | MARS                | 1.69 | 0.003   | ID1                   | 0.57 | 0.003   |
| ZC3H6                 | 1.53 | 0.001   | CCNA1                   | 0.64 | 0.014   | MGEA5               | 1.69 | 0.008   | TNF                   | 0.58 | 0.003   |
| UBA7                  | 1.53 | 0.011   | C6orf223                | 0.64 | 0.007   | NHS                 | 1.69 | 0.013   | KBTBD8                | 0.58 | 0.009   |
| ANK2                  | 1.53 | 0.004   | GAPT                    | 0.65 | 0.017   | C6orf48             | 1.68 | 0       | HLA-DQB1-AS1          | 0.58 | 0.044   |
| C12orf66              | 1.53 | 0.001   | CD300A                  | 0.65 | 0.017   | LRRC2               | 1.68 | 0.012   | PANX1                 | 0.58 | 0.005   |
| ANKRD16               | 1.53 | 0.015   | GBP2                    | 0.65 | 0.003   | FAM214A             | 1.68 | 0.004   | CEACAM6               | 0.58 | 0.042   |
| OC10050573            | 1.53 | 0.031   | PLAG1                   | 0.65 | 0.017   | GDAP1L1             | 1.67 | 0.004   | MLK1                  | 0.58 | 0.009   |
| RRN3P2                | 1.53 | 0.002   | PCNA-AS1                | 0.65 | 0.048   | MIR580              | 1.67 | 0.031   | GRWD1                 | 0.58 | 0.018   |
| GUSBP4                | 1.53 | 0.016   | SPN                     | 0.65 | 0.008   | HOXA2               | 1.67 | 0.013   | MOC3                  | 0.58 | 0       |
| USP32P2               | 1.53 | 0.029   | KIF4A                   | 0.65 | 0.006   | SPNS3               | 1.66 | 0       | DHRS9                 | 0.58 | 0.018   |
| BBS2                  | 1.52 | 0       | RGS18                   | 0.66 | 0.018   | TRIB3               | 1.66 | 0       | RN5553                | 0.58 | 0.012   |
| PVT1                  | 1.52 | 0.047   | GABRA4                  | 0.66 | 0.006   | SETDB2              | 1.66 | 0.004   | DANCR                 | 0.58 | 0.003   |
| OC10050668            | 1.52 | 0.015   | LSS                     | 0.66 | 0.002   | SYTL1               | 1.65 | 0.001   | LOC100288432          | 0.59 | 0       |
| SNX29P2               | 1.52 | 0.016   | TRAJ17                  | 0.67 | 0.006   | AOAH                | 1.65 | 0.004   | IL22RA2               | 0.59 | 0.024   |
| LOC728190             | 1.51 | 0.004   | NFE2                    | 0.67 | 0.019   | PCK2                | 1.65 | 0.003   | E2F2                  | 0.59 | 0.003   |
| MSS51                 | 1.51 | 0.001   | CD83                    | 0.67 | 0.024   | ASAH1               | 1.64 | 0.002   | DCTPP1                | 0.59 | 0.007   |
| ZNF354B               | 1.51 | 0.003   | SOC3                    | 0.67 | 0.007   | CNTNAP3             | 1.64 | 0.013   | ALDH1B1               | 0.59 | 0.005   |
| OC10065284            | 1.51 | 0.048   | SLC46A3                 | 0.67 | 0.018   | TANC2               | 1.64 | 0.008   | GPR183                | 0.59 | 0.01    |
| WHAMMP2               | 1.5  | 0.023   | RN55335                 | 0.67 | 0.026   | LYRM5               | 1.64 | 0.017   | FBX033                | 0.59 | 0.007   |
| SLC22A15              | 1.5  | 0.018   | PKD3                    | 0.67 | 0.038   | HLCS                | 1.64 | 0.018   | C1orf38               | 0.6  | 0.002   |
| RASA4B                | 1.5  | 0.004   | ACAT2                   | 0.68 | 0.006   | NHSL1               | 1.64 | 0.001   | FAM57A                | 0.6  | 0.004   |
| RN55474               | 1.49 | 0.012   | BNIP3                   | 0.68 | 0.002   | CARS                | 1.64 | 0       | C19orf10              | 0.6  | 0.015   |
| SOC3                  | 1.49 | 0.006   | TNFRSF19                | 0.68 | 0.016   | FAM129A             | 1.63 | 0.01    | TOE1                  | 0.6  | 0.008   |
| OC10019098            | 1.49 | 0.029   | METTL7A                 | 0.68 | 0.016   | RNY4P1              | 1.63 | 0.023   | HNRNPM                | 0.6  | 0.002   |
| ADAT2                 | 1.49 | 0.005   | DEPDC7                  | 0.68 | 0.025   | MANBA               | 1.63 | 0.019   | CDC6                  | 0.6  | 0.002   |
| GPCPD1                | 1.49 | 0       | STRA13                  | 0.68 | 0.001   | PHKB                | 1.63 | 0.022   | LOC100130698          | 0.6  | 0.016   |
| LENG8-AS1             | 1.49 | 0       | HIST1H4D                | 0.68 | 0.031   | ARMC12              | 1.63 | 0       | HIST1H3I              | 0.61 | 0.005   |
| OC10050676            | 1.48 | 0.002   | CD36                    | 0.68 | 0.029   | STGALNAC3           | 1.63 | 0.01    | CD180                 | 0.61 | 0.005   |
| FLJ13197              | 1.48 | 0.024   | LOC100653350            | 0.68 | 0.003   | OSCAR               | 1.62 | 0.024   | RNU5E-4P              | 0.61 | 0.014   |
| OC10050732            | 1.48 | 0.011   | POU3F2                  | 0.68 | 0.023   | UBXN2B              | 1.62 | 0.001   | MRPS12                | 0.61 | 0.002   |
| PARP6                 | 1.48 | 0.026   | IGHM                    | 0.68 | 0.039   | CENPJ               | 1.62 | 0.002   | MEX3D                 | 0.61 | 0.002   |
| ZFP62                 | 1.48 | 0       | IPCEF1                  | 0.68 | 0.005   | CNTNAP3B            | 1.62 | 0.022   | MCAT                  | 0.62 | 0.011   |
| LONP1                 | 1.48 | 0.001   | KLF6                    | 0.68 | 0.013   | ARSD                | 1.61 | 0.001   | MMP8                  | 0.62 | 0.049   |
| H6PD                  | 1.47 | 0.048   | NEFH                    | 0.68 | 0.006   | SARS                | 1.61 | 0.031   | PCYT1B                | 0.62 | 0.004   |
| LOC728888             | 1.47 | 0.005   | RNASE3                  | 0.69 | 0.003   | C5AR1               | 1.6  | 0.032   | LRRC59                | 0.62 | 0.002   |
| TLR2                  | 1.47 | 0.011   | HMGCS1                  | 0.69 | 0.009   | RNASEH2B            | 1.6  | 0.008   | CCDC86                | 0.62 | 0.003   |
| UTS2                  | 1.47 | 0.003   | FBXO33                  | 0.69 | 0.03    | ZNF506              | 1.6  | 0.022   | RRS1                  | 0.62 | 0.017   |
| DYP19L2P3             | 1.47 | 0.004   | TLCD1                   | 0.69 | 0.034   | TAAR5               | 1.6  | 0.008   | UTP3                  | 0.62 | 0.003   |
| CUL9                  | 1.47 | 0.01    | POLA1                   | 0.69 | 0.022   | ERMPI1              | 1.6  | 0.003   | MIR3661               | 0.62 | 0.045   |
| PLD6                  | 1.47 | 0.003   | HIST1H2BL               | 0.69 | 0.01    | ERAP2               | 1.59 | 0.014   | PGAM1                 | 0.62 | 0       |
| FAM91A2               | 1.46 | 0.004   | FASN                    | 0.69 | 0.001   | TMEM98-AS1          | 1.59 | 0.006   | NXPE3                 | 0.62 | 0.008   |
| D2HGDH                | 1.46 | 0.041   | ELAVL4                  | 0.69 | 0.009   | XPOT                | 1.59 | 0.003   | SSSCA1                | 0.63 | 0.022   |
| PLXNC1                | 1.46 | 0.006   | LINC00467               | 0.69 | 0.008   | SKIL                | 1.58 | 0.001   | DHCR7                 | 0.63 | 0.018   |
| IL15RA                | 1.46 | 0.007   | CX3CR1                  | 0.69 | 0.001   | C2                  | 1.58 | 0.033   | C3AR1                 | 0.63 | 0.017   |
| GSDMB                 | 1.46 | 0.004   | DLGAP5                  | 0.69 | 0.021   | FIG4                | 1.57 | 0.032   | RNU5A-8P              | 0.63 | 0.026   |
| FLJ45340              | 1.46 | 0.015   | GBE1                    | 0.69 | 0.003   | FAM70B              | 1.57 | 0.001   | CD3EAP                | 0.63 | 0.008   |
| OC10050673            | 1.46 | 0.007   | BNIP3L                  | 0.69 | 0.017   | C6orf165            | 1.57 | 0.026   | UHRF1                 | 0.63 | 0.003   |
| BTN2A3P               | 1.45 | 0.005   | SPR                     | 0.7  | 0.006   | MIR54814            | 1.57 | 0.049   | POLR2L                | 0.63 | 0.013   |

**Supplementary Table 3. Top 100 differentially expressed genes for MOLM14 and U937 metformin vs control.** Transcriptome profiling assays on MOLM14 and U937 treated or not with 10mM metformin in independent triplicates (1 experiment). GEO: GSE97346.

| MOLM14/U937 COMMON UP ; #33 | MOLM14/U937 COMMON DOWN ; #28 |
|-----------------------------|-------------------------------|
| CTH                         | PCNA-AS1                      |
| PSAT1                       | FADS1                         |
| TUBE1                       | HIST1H4D                      |
| ASNS                        | SDF2L1                        |
| SPG11                       | FBXO33                        |
| BBS2                        | HIST1H2AB                     |
| RASA4                       | CD83                          |
| JHDM1D                      | CABLES2                       |
| ZC3H6                       | LDLR                          |
| TRIB3                       | GAPT                          |
| VEGFA                       | MSMO1                         |
| DDIT3                       | CCNA1                         |
| SARS                        | HMGCS1                        |
| MIR628                      | ACAT2                         |
| DDIT4                       | GDAP1                         |
| SLC7A11                     | TRAJ17                        |
| ATF5                        | IPCEF1                        |
| ADAT2                       | INSIG1                        |
| ULBP1                       | E2F8                          |
| IL31RA                      | RNASE3                        |
| SESN2                       | GINS2                         |
| BACE1-AS                    | FASN                          |
| P2RX7                       | ANXA1                         |
| NHSL1                       | TARP                          |
| RASA4                       | RRM2                          |
| CUL9                        | STRA13                        |
| TAP2                        | GPR183                        |
| TAP2                        | DHCR24                        |
| HLCS                        |                               |
| SKIL                        |                               |
| RASA4                       |                               |
| PCK2                        |                               |
| RRP7B                       |                               |

**Supplementary Table 4. MOLM14 and U937 common UP and DOWN genes for metformin vs control.** Transcriptome profiling assays on MOLM14 and U937 treated or not with 10mM metformin in independent triplicates (1 experiment). GEO: GSE97346.

|                                                                    | GO-Term                                                    | GO-Term id        | P-value                                              | List of observed genes                                                                                                            |
|--------------------------------------------------------------------|------------------------------------------------------------|-------------------|------------------------------------------------------|-----------------------------------------------------------------------------------------------------------------------------------|
| <b>COMMON DOWN-regulated</b>                                       | organic substance biosynthetic process                     | GO:1901576        | 0.01                                                 | FADS1, DHCR24, LDLR, FASN, RRM2, HIST1H4D, ANXA1, HMGC51, ACAT2, GINS2, INSIG1, MSMO1, CCNA1, E2F8                                |
|                                                                    | small molecule metabolic process                           | GO:0044281        | 0                                                    | FADS1, DHCR24, LDLR, FASN, RRM2, ANXA1, HMGC51, ACAT2, INSIG1, MSMO1                                                              |
|                                                                    | <b>lipid metabolic process</b>                             | <b>GO:0006629</b> | <b>0</b>                                             | <b>FADS1, DHCR24, LDLR, FASN, ANXA1, HMGC51, ACAT2, INSIG1, MSMO1</b>                                                             |
|                                                                    | small molecule biosynthetic process                        | GO:0044283        | 0                                                    | FADS1, DHCR24, FASN, ANXA1, HMGC51, ACAT2, INSIG1, MSMO1                                                                          |
|                                                                    | cellular lipid metabolic process                           | GO:0044255        | 0                                                    | FADS1, LDLR, FASN, ANXA1, HMGC51, ACAT2, INSIG1, MSMO1                                                                            |
|                                                                    | cholesterol metabolic process                              | GO:0008203        | 0                                                    | DHCR24, LDLR, FASN, HMGC51, ACAT2, INSIG1, MSMO1                                                                                  |
|                                                                    | secondary alcohol metabolic process                        | GO:1902652        | 0                                                    | DHCR24, LDLR, FASN, HMGC51, ACAT2, INSIG1, MSMO1                                                                                  |
|                                                                    | sterol metabolic process                                   | GO:0016125        | 0                                                    | DHCR24, LDLR, FASN, HMGC51, ACAT2, INSIG1, MSMO1                                                                                  |
|                                                                    | steroid metabolic process                                  | GO:0008202        | 0                                                    | DHCR24, LDLR, FASN, HMGC51, ACAT2, INSIG1, MSMO1                                                                                  |
|                                                                    | alcohol metabolic process                                  | GO:0006066        | 0                                                    | DHCR24, LDLR, FASN, HMGC51, ACAT2, INSIG1, MSMO1                                                                                  |
|                                                                    | organic hydroxy compound metabolic process                 | GO:1901615        | 0                                                    | DHCR24, LDLR, FASN, HMGC51, ACAT2, INSIG1, MSMO1                                                                                  |
|                                                                    | <b>regulation of cell differentiation</b>                  | <b>GO:0045595</b> | <b>0.01</b>                                          | <b>FADS1, LDLR, HIST1H4D, ANXA1, CD83, GPR183, INSIG1</b>                                                                         |
|                                                                    | <b>cellular response to stress</b>                         | <b>GO:0033554</b> | <b>0.01</b>                                          | <b>FADS1, SDF2L1, HIST1H4D, ANXA1, GINS2, INSIG1, E2F8</b>                                                                        |
|                                                                    | cholesterol biosynthetic process                           | GO:0006695        | 0                                                    | DHCR24, FASN, HMGC51, ACAT2, INSIG1, MSMO1                                                                                        |
|                                                                    | secondary alcohol biosynthetic process                     | GO:1902653        | 0                                                    | DHCR24, FASN, HMGC51, ACAT2, INSIG1, MSMO1                                                                                        |
|                                                                    | sterol biosynthetic process                                | GO:0016126        | 0                                                    | DHCR24, FASN, HMGC51, ACAT2, INSIG1, MSMO1                                                                                        |
|                                                                    | alcohol biosynthetic process                               | GO:0046165        | 0                                                    | DHCR24, FASN, HMGC51, ACAT2, INSIG1, MSMO1                                                                                        |
|                                                                    | steroid biosynthetic process                               | GO:0006694        | 0                                                    | DHCR24, FASN, HMGC51, ACAT2, INSIG1, MSMO1                                                                                        |
|                                                                    | organic hydroxy compound biosynthetic process              | GO:1901617        | 0                                                    | DHCR24, FASN, HMGC51, ACAT2, INSIG1, MSMO1                                                                                        |
|                                                                    | fatty acid metabolic process                               | GO:0006631        | 0                                                    | FADS1, FASN, ANXA1, ACAT2, INSIG1, MSMO1                                                                                          |
|                                                                    | regulation of lipid metabolic process                      | GO:0019216        | 0                                                    | FADS1, LDLR, FASN, ANXA1, HMGC51, INSIG1                                                                                          |
|                                                                    | monocarboxylic acid metabolic process                      | GO:0032787        | 0                                                    | FADS1, FASN, ANXA1, ACAT2, INSIG1, MSMO1                                                                                          |
|                                                                    | oxidation-reduction process                                | GO:0055114        | 0                                                    | FADS1, DHCR24, FASN, RRM2, ACAT2, MSMO1                                                                                           |
|                                                                    | carboxylic acid metabolic process                          | GO:0019752        | 0                                                    | FADS1, FASN, ANXA1, ACAT2, INSIG1, MSMO1                                                                                          |
|                                                                    | oxoacid metabolic process                                  | GO:0043436        | 0                                                    | FADS1, FASN, ANXA1, ACAT2, INSIG1, MSMO1                                                                                          |
|                                                                    | organic acid metabolic process                             | GO:0006082        | 0                                                    | FADS1, FASN, ANXA1, ACAT2, INSIG1, MSMO1                                                                                          |
|                                                                    | <b>regulation of cell cycle</b>                            | <b>GO:0051726</b> | <b>0</b>                                             | <b>DHCR24, RRM2, ANXA1, CCNA1, CABLE2, E2F8</b>                                                                                   |
|                                                                    | leukocyte activation                                       | GO:0045321        | 0                                                    | RNASE3, LDLR, GAPT, ANXA1, CD83, GPR183                                                                                           |
|                                                                    | cell activation                                            | GO:0001775        | 0.01                                                 | RNASE3, LDLR, GAPT, ANXA1, CD83, GPR183                                                                                           |
|                                                                    | regulation of lipid biosynthetic process                   | GO:0046890        | 0                                                    | LDLR, FASN, ANXA1, HMGC51, INSIG1                                                                                                 |
|                                                                    | regulation of small molecule metabolic process             | GO:0062012        | 0                                                    | LDLR, FASN, ANXA1, HMGC51, INSIG1                                                                                                 |
|                                                                    | cellular response to lipid                                 | GO:0071396        | 0                                                    | GDAP1, LDLR, ANXA1, HMGC51, INSIG1                                                                                                |
|                                                                    | hemopoiesis                                                | GO:0030097        | 0                                                    | FASN, HIST1H4D, ANXA1, CD83, GPR183                                                                                               |
|                                                                    | hematopoietic or lymphoid organ development                | GO:0048534        | 0                                                    | FASN, HIST1H4D, ANXA1, CD83, GPR183                                                                                               |
|                                                                    | response to lipid                                          | GO:0033993        | 0.01                                                 | GDAP1, LDLR, ANXA1, HMGC51, INSIG1                                                                                                |
|                                                                    | response to organic cyclic compound                        | GO:0014070        | 0.01                                                 | GDAP1, ANXA1, CD83, HMGC51, INSIG1                                                                                                |
|                                                                    | immune system development                                  | GO:0002520        | 0.01                                                 | FASN, HIST1H4D, ANXA1, CD83, GPR183                                                                                               |
|                                                                    | regulation of steroid metabolic process                    | GO:0019218        | 0                                                    | LDLR, FASN, HMGC51, INSIG1                                                                                                        |
|                                                                    | fatty acid biosynthetic process                            | GO:0006633        | 0                                                    | FADS1, FASN, ANXA1, INSIG1                                                                                                        |
|                                                                    | G1/S transition of mitotic cell cycle                      | GO:0000082        | 0                                                    | RRM2, ANXA1, CCNA1, E2F8                                                                                                          |
|                                                                    | cell cycle G1/S phase transition                           | GO:0044830        | 0                                                    | RRM2, ANXA1, CCNA1, E2F8                                                                                                          |
|                                                                    | monocarboxylic acid biosynthetic process                   | GO:0072330        | 0                                                    | FADS1, FASN, ANXA1, INSIG1                                                                                                        |
|                                                                    | carboxylic acid biosynthetic process                       | GO:0046394        | 0                                                    | FADS1, FASN, ANXA1, INSIG1                                                                                                        |
|                                                                    | organic acid biosynthetic process                          | GO:0016053        | 0                                                    | FADS1, FASN, ANXA1, INSIG1                                                                                                        |
| gland development                                                  | GO:0048732                                                 | 0                 | FASN, ANXA1, HMGC51, E2F8                            |                                                                                                                                   |
| response to nutrient levels                                        | GO:0031667                                                 | 0                 | FADS1, GDAP1, LDLR, HMGC51                           |                                                                                                                                   |
| leukocyte differentiation                                          | GO:0002521                                                 | 0                 | FASN, ANXA1, CD83, GPR183                            |                                                                                                                                   |
| response to extracellular stimulus                                 | GO:0009991                                                 | 0                 | FADS1, GDAP1, LDLR, HMGC51                           |                                                                                                                                   |
| mitotic cell cycle phase transition                                | GO:0044772                                                 | 0                 | RRM2, ANXA1, CCNA1, E2F8                             |                                                                                                                                   |
| cellular response to organic cyclic compound                       | GO:0071407                                                 | 0                 | GDAP1, ANXA1, HMGC51, INSIG1                         |                                                                                                                                   |
| regulation of leukocyte activation                                 | GO:0002694                                                 | 0.01              | LDLR, ANXA1, CD83, GPR183                            |                                                                                                                                   |
| cell cycle phase transition                                        | GO:0044770                                                 | 0.01              | RRM2, ANXA1, CCNA1, E2F8                             |                                                                                                                                   |
| regulation of cell activation                                      | GO:0050865                                                 | 0.01              | LDLR, ANXA1, CD83, GPR183                            |                                                                                                                                   |
| <b>COMMON UP-regulated</b>                                         | cellular nitrogen compound metabolic process               | GO:0034641        | 0                                                    | ZC3H6, SARS, P2RX7, ATF5, DDIT4, KDM7A, ASNS, SLC7A11, IL131RA, CTH, SESN2, PSAT1, VEGFA, RRP7BP, SKIL, TRIB3, HLCS, ADAT2, DDIT3 |
|                                                                    | organic cyclic compound metabolic process                  | GO:1901360        | 0                                                    | ZC3H6, SARS, P2RX7, ATF5, DDIT4, KDM7A, SLC7A11, IL131RA, CTH, SESN2, PSAT1, VEGFA, RRP7BP, SKIL, TRIB3, HLCS, ADAT2, DDIT3       |
|                                                                    | negative regulation of biological process                  | GO:0048519        | 0                                                    | ZC3H6, SARS, RASA4, P2RX7, ATF5, DDIT4, ASNS, SLC7A11, IL131RA, CTH, SESN2, VEGFA, BBS2, SKIL, TRIB3, MIR628, DDIT3               |
|                                                                    | cellular nitrogen compound biosynthetic process            | GO:0044271        | 0                                                    | ZC3H6, SARS, P2RX7, ATF5, DDIT4, KDM7A, ASNS, SLC7A11, IL131RA, CTH, SESN2, PSAT1, VEGFA, SKIL, TRIB3, DDIT3                      |
|                                                                    | aromatic compound biosynthetic process                     | GO:0019438        | 0                                                    | ZC3H6, SARS, P2RX7, ATF5, DDIT4, KDM7A, SLC7A11, IL131RA, CTH, SESN2, PSAT1, VEGFA, SKIL, TRIB3, DDIT3                            |
|                                                                    | organic cyclic compound biosynthetic process               | GO:1901362        | 0                                                    | ZC3H6, SARS, P2RX7, ATF5, DDIT4, KDM7A, SLC7A11, IL131RA, CTH, SESN2, PSAT1, VEGFA, SKIL, TRIB3, DDIT3                            |
|                                                                    | response to chemical                                       | GO:0042221        | 0                                                    | RASA4, P2RX7, DDIT4, ASNS, SLC7A11, IL131RA, PCK2, CTH, SESN2, VEGFA, BBS2, SKIL, TRIB3, HLCS, DDIT3                              |
|                                                                    | negative regulation of cellular process                    | GO:0048523        | 0                                                    | ZC3H6, SARS, RASA4, P2RX7, ATF5, DDIT4, ASNS, SLC7A11, IL131RA, CTH, SESN2, VEGFA, SKIL, TRIB3, DDIT3                             |
|                                                                    | system development                                         | GO:0048731        | 0                                                    | SARS, P2RX7, ATF5, DDIT4, KDM7A, ASNS, SLC7A11, SPG11, IL131RA, PCK2, CTH, VEGFA, BBS2, SKIL, DDIT3                               |
|                                                                    | multicellular organism development                         | GO:0007275        | 0.01                                                 | SARS, P2RX7, ATF5, DDIT4, KDM7A, ASNS, SLC7A11, SPG11, IL131RA, PCK2, CTH, VEGFA, BBS2, SKIL, DDIT3                               |
|                                                                    | cellular response to chemical stimulus                     | GO:0070087        | 0                                                    | RASA4, P2RX7, DDIT4, ASNS, SLC7A11, IL131RA, PCK2, CTH, SESN2, VEGFA, BBS2, SKIL, TRIB3, DDIT3                                    |
|                                                                    | response to organic substance                              | GO:0010033        | 0                                                    | P2RX7, DDIT4, ASNS, SLC7A11, IL131RA, PCK2, CTH, SESN2, VEGFA, BBS2, SKIL, TRIB3, HLCS, DDIT3                                     |
|                                                                    | regulation of cellular biosynthetic process                | GO:0031326        | 0                                                    | ZC3H6, SARS, P2RX7, ATF5, DDIT4, KDM7A, SLC7A11, IL131RA, CTH, SESN2, VEGFA, SKIL, TRIB3, DDIT3                                   |
|                                                                    | heterocycle biosynthetic process                           | GO:0018130        | 0                                                    | ZC3H6, SARS, P2RX7, ATF5, DDIT4, KDM7A, IL131RA, CTH, SESN2, PSAT1, VEGFA, SKIL, TRIB3, DDIT3                                     |
|                                                                    | regulation of biosynthetic process                         | GO:0009889        | 0                                                    | ZC3H6, SARS, P2RX7, ATF5, DDIT4, KDM7A, SLC7A11, IL131RA, CTH, SESN2, VEGFA, SKIL, TRIB3, DDIT3                                   |
|                                                                    | cellular developmental process                             | GO:0048869        | 0                                                    | P2RX7, ATF5, DDIT4, SLC7A11, SPG11, IL131RA, PCK2, CTH, VEGFA, NHS1, BBS2, SKIL, TRIB3, DDIT3                                     |
|                                                                    | regulation of response to stimulus                         | GO:0048583        | 0.01                                                 | RASA4, P2RX7, DDIT4, SLC7A11, IL131RA, CTH, ULBP1, SESN2, VEGFA, BBS2, SKIL, TRIB3, DDIT3                                         |
|                                                                    | cellular response to organic substance                     | GO:0071310        | 0                                                    | P2RX7, DDIT4, ASNS, IL131RA, PCK2, CTH, SESN2, VEGFA, BBS2, SKIL, TRIB3, DDIT3                                                    |
|                                                                    | negative regulation of macromolecule metabolic process     | GO:0010605        | 0                                                    | ZC3H6, SARS, P2RX7, ATF5, DDIT4, SESN2, VEGFA, BBS2, SKIL, TRIB3, MIR628, DDIT3                                                   |
|                                                                    | <b>organelle organization</b>                              | <b>GO:0006996</b> | <b>0.01</b>                                          | <b>TUBE1, P2RX7, ATF5, KDM7A, SPG11, TAP2, SESN2, CUL9, VEGFA, BBS2, RRP7BP, HLCS</b>                                             |
|                                                                    | carboxylic acid metabolic process                          | GO:0019752        | 0                                                    | SARS, P2RX7, DDIT4, ASNS, SLC7A11, PCK2, CTH, SESN2, PSAT1, TRIB3, HLCS                                                           |
|                                                                    | oxoacid metabolic process                                  | GO:0043436        | 0                                                    | SARS, P2RX7, DDIT4, ASNS, SLC7A11, PCK2, CTH, SESN2, PSAT1, TRIB3, HLCS                                                           |
|                                                                    | organic acid metabolic process                             | GO:0006082        | 0                                                    | SARS, P2RX7, DDIT4, ASNS, SLC7A11, PCK2, CTH, SESN2, PSAT1, TRIB3, HLCS                                                           |
|                                                                    | <b>apoptotic process</b>                                   | <b>GO:0006915</b> | <b>0</b>                                             | <b>P2RX7, ATF5, DDIT4, ASNS, SLC7A11, IL131RA, CTH, VEGFA, SKIL, TRIB3, DDIT3</b>                                                 |
|                                                                    | small molecule metabolic process                           | GO:0044281        | 0                                                    | SARS, P2RX7, DDIT4, ASNS, SLC7A11, PCK2, CTH, SESN2, PSAT1, TRIB3, HLCS                                                           |
|                                                                    | programmed cell death                                      | GO:0012501        | 0                                                    | P2RX7, ATF5, DDIT4, ASNS, SLC7A11, IL131RA, CTH, VEGFA, SKIL, TRIB3, DDIT3                                                        |
|                                                                    | cell death                                                 | GO:0008219        | 0                                                    | P2RX7, ATF5, DDIT4, ASNS, SLC7A11, IL131RA, CTH, VEGFA, SKIL, TRIB3, DDIT3                                                        |
|                                                                    | negative regulation of response to stimulus                | GO:0048585        | 0                                                    | RASA4, P2RX7, DDIT4, SLC7A11, CTH, SESN2, BBS2, SKIL, TRIB3, DDIT3                                                                |
|                                                                    | regulation of cell death                                   | GO:0010941        | 0                                                    | P2RX7, ATF5, DDIT4, ASNS, SLC7A11, IL131RA, CTH, VEGFA, SKIL, DDIT3                                                               |
|                                                                    | regulation of intracellular signal transduction            | GO:1902531        | 0                                                    | RASA4, P2RX7, DDIT4, IL131RA, CTH, SESN2, VEGFA, SKIL, TRIB3, DDIT3                                                               |
|                                                                    | negative regulation of gene expression                     | GO:0010629        | 0                                                    | ZC3H6, SARS, ATF5, SESN2, VEGFA, BBS2, SKIL, TRIB3, MIR628, DDIT3                                                                 |
|                                                                    | negative regulation of nitrogen compound metabolic process | GO:0051172        | 0                                                    | ZC3H6, SARS, P2RX7, ATF5, DDIT4, SESN2, VEGFA, SKIL, TRIB3, DDIT3                                                                 |
|                                                                    | response to external stimulus                              | GO:0009605        | 0                                                    | P2RX7, DDIT4, ASNS, IL131RA, PCK2, SESN2, VEGFA, BBS2, HLCS, DDIT3                                                                |
|                                                                    | negative regulation of cellular metabolic process          | GO:0031324        | 0                                                    | ZC3H6, SARS, P2RX7, ATF5, DDIT4, SESN2, VEGFA, SKIL, TRIB3, DDIT3                                                                 |
|                                                                    | intracellular signal transduction                          | GO:0035556        | 0.01                                                 | RASA4, P2RX7, DDIT4, IL131RA, CTH, SESN2, VEGFA, SKIL, TRIB3, DDIT3                                                               |
|                                                                    | regulation of apoptotic process                            | GO:0042981        | 0                                                    | P2RX7, ATF5, ASNS, SLC7A11, IL131RA, CTH, VEGFA, SKIL, DDIT3                                                                      |
|                                                                    | regulation of programmed cell death                        | GO:0043067        | 0                                                    | P2RX7, ATF5, ASNS, SLC7A11, IL131RA, CTH, VEGFA, SKIL, DDIT3                                                                      |
|                                                                    | negative regulation of cellular biosynthetic process       | GO:0031327        | 0                                                    | ZC3H6, SARS, ATF5, DDIT4, SESN2, VEGFA, SKIL, TRIB3, DDIT3                                                                        |
|                                                                    | negative regulation of biosynthetic process                | GO:0009890        | 0                                                    | ZC3H6, SARS, ATF5, DDIT4, SESN2, VEGFA, SKIL, TRIB3, DDIT3                                                                        |
|                                                                    | homeostatic process                                        | GO:0042592        | 0                                                    | P2RX7, SLC7A11, IL131RA, PCK2, SESN2, VEGFA, BBS2, SKIL, DDIT3                                                                    |
|                                                                    | <b>cellular response to stress</b>                         | <b>GO:0033554</b> | <b>0</b>                                             | <b>DDIT4, ASNS, SLC7A11, CTH, SESN2, VEGFA, SKIL, TRIB3, DDIT3</b>                                                                |
|                                                                    | small molecule biosynthetic process                        | GO:0044283        | 0                                                    | P2RX7, DDIT4, ASNS, PCK2, CTH, SESN2, PSAT1, TRIB3                                                                                |
|                                                                    | negative regulation of signal transduction                 | GO:0009968        | 0                                                    | RASA4, P2RX7, DDIT4, CTH, SESN2, SKIL, TRIB3, DDIT3                                                                               |
|                                                                    | negative regulation of cell communication                  | GO:0010648        | 0                                                    | RASA4, P2RX7, DDIT4, CTH, SESN2, SKIL, TRIB3, DDIT3                                                                               |
| negative regulation of signaling                                   | GO:0023057                                                 | 0                 | RASA4, P2RX7, DDIT4, CTH, SESN2, SKIL, TRIB3, DDIT3  |                                                                                                                                   |
| cellular response to endogenous stimulus                           | GO:0071495                                                 | 0                 | P2RX7, DDIT4, ASNS, PCK2, SESN2, BBS2, SKIL, TRIB3   |                                                                                                                                   |
| negative regulation of cellular macromolecule biosynthetic process | GO:2000113                                                 | 0                 | ZC3H6, SARS, ATF5, SESN2, VEGFA, SKIL, TRIB3, DDIT3  |                                                                                                                                   |
| negative regulation of nucleobase-containing compound m            | GO:0045934                                                 | 0                 | ZC3H6, SARS, ATF5, DDIT4, VEGFA, SKIL, TRIB3, DDIT3  |                                                                                                                                   |
| negative regulation of macromolecule biosynthetic process          | GO:0010558                                                 | 0                 | ZC3H6, SARS, ATF5, SESN2, VEGFA, SKIL, TRIB3, DDIT3  |                                                                                                                                   |
| response to endogenous stimulus                                    | GO:0009719                                                 | 0                 | P2RX7, DDIT4, ASNS, PCK2, SESN2, BBS2, SKIL, TRIB3   |                                                                                                                                   |
| organonitrogen compound biosynthetic process                       | GO:1901566                                                 | 0.01              | SARS, P2RX7, DDIT4, ASNS, SLC7A11, CTH, SESN2, PSAT1 |                                                                                                                                   |
| response to nutrient levels                                        | GO:0031667                                                 | 0                 | P2RX7, ASNS, PCK2, SESN2, BBS2, HLCS, DDIT3          |                                                                                                                                   |
| response to extracellular stimulus                                 | GO:0009991                                                 | 0                 | P2RX7, ASNS, PCK2, SESN2, BBS2, HLCS, DDIT3          |                                                                                                                                   |
| monocarboxylic acid metabolic process                              | GO:0032787                                                 | 0                 | P2RX7, DDIT4, ASNS, PCK2, SESN2, TRIB3, HLCS         |                                                                                                                                   |
| <b>drug metabolic process</b>                                      | <b>GO:0017144</b>                                          | <b>0</b>          | <b>P2RX7, DDIT4, ASNS, PCK2, CTH, PSAT1, HLCS</b>    |                                                                                                                                   |
| negative regulation of transcription, DNA-templated                | GO:0045892                                                 | 0                 | ZC3H6, SARS, ATF5, VEGFA, SKIL, TRIB3, DDIT3         |                                                                                                                                   |
| negative regulation of nucleic acid-templated transcription        | GO:1903507                                                 | 0                 | ZC3H6, SARS, ATF5, VEGFA, SKIL, TRIB3, DDIT3         |                                                                                                                                   |
| negative regulation of RNA biosynthetic process                    | GO:1902679                                                 | 0                 | ZC3H6, SARS, ATF5, VEGFA, SKIL, TRIB3, DDIT3         |                                                                                                                                   |
| negative regulation of RNA metabolic process                       | GO:0051253                                                 | 0                 | ZC3H6, SARS, ATF5, VEGFA, SKIL, TRIB3, DDIT3         |                                                                                                                                   |
| response to oxygen-containing compound                             | GO:1901700                                                 | 0.01              | P2RX7, DDIT4, ASNS, PCK2, SESN2, TRIB3, HLCS         |                                                                                                                                   |

**Supplementary Table 5. GO-term enriched in MOLM14 and U937 metformin vs control using Genomatix**  
Transcriptome profiling assays on MOLM14 and U937 treated or not with 10mM metformin in independent triplicates (1 experiment). GEO: GSE97346.

## **Supplementary Figures**

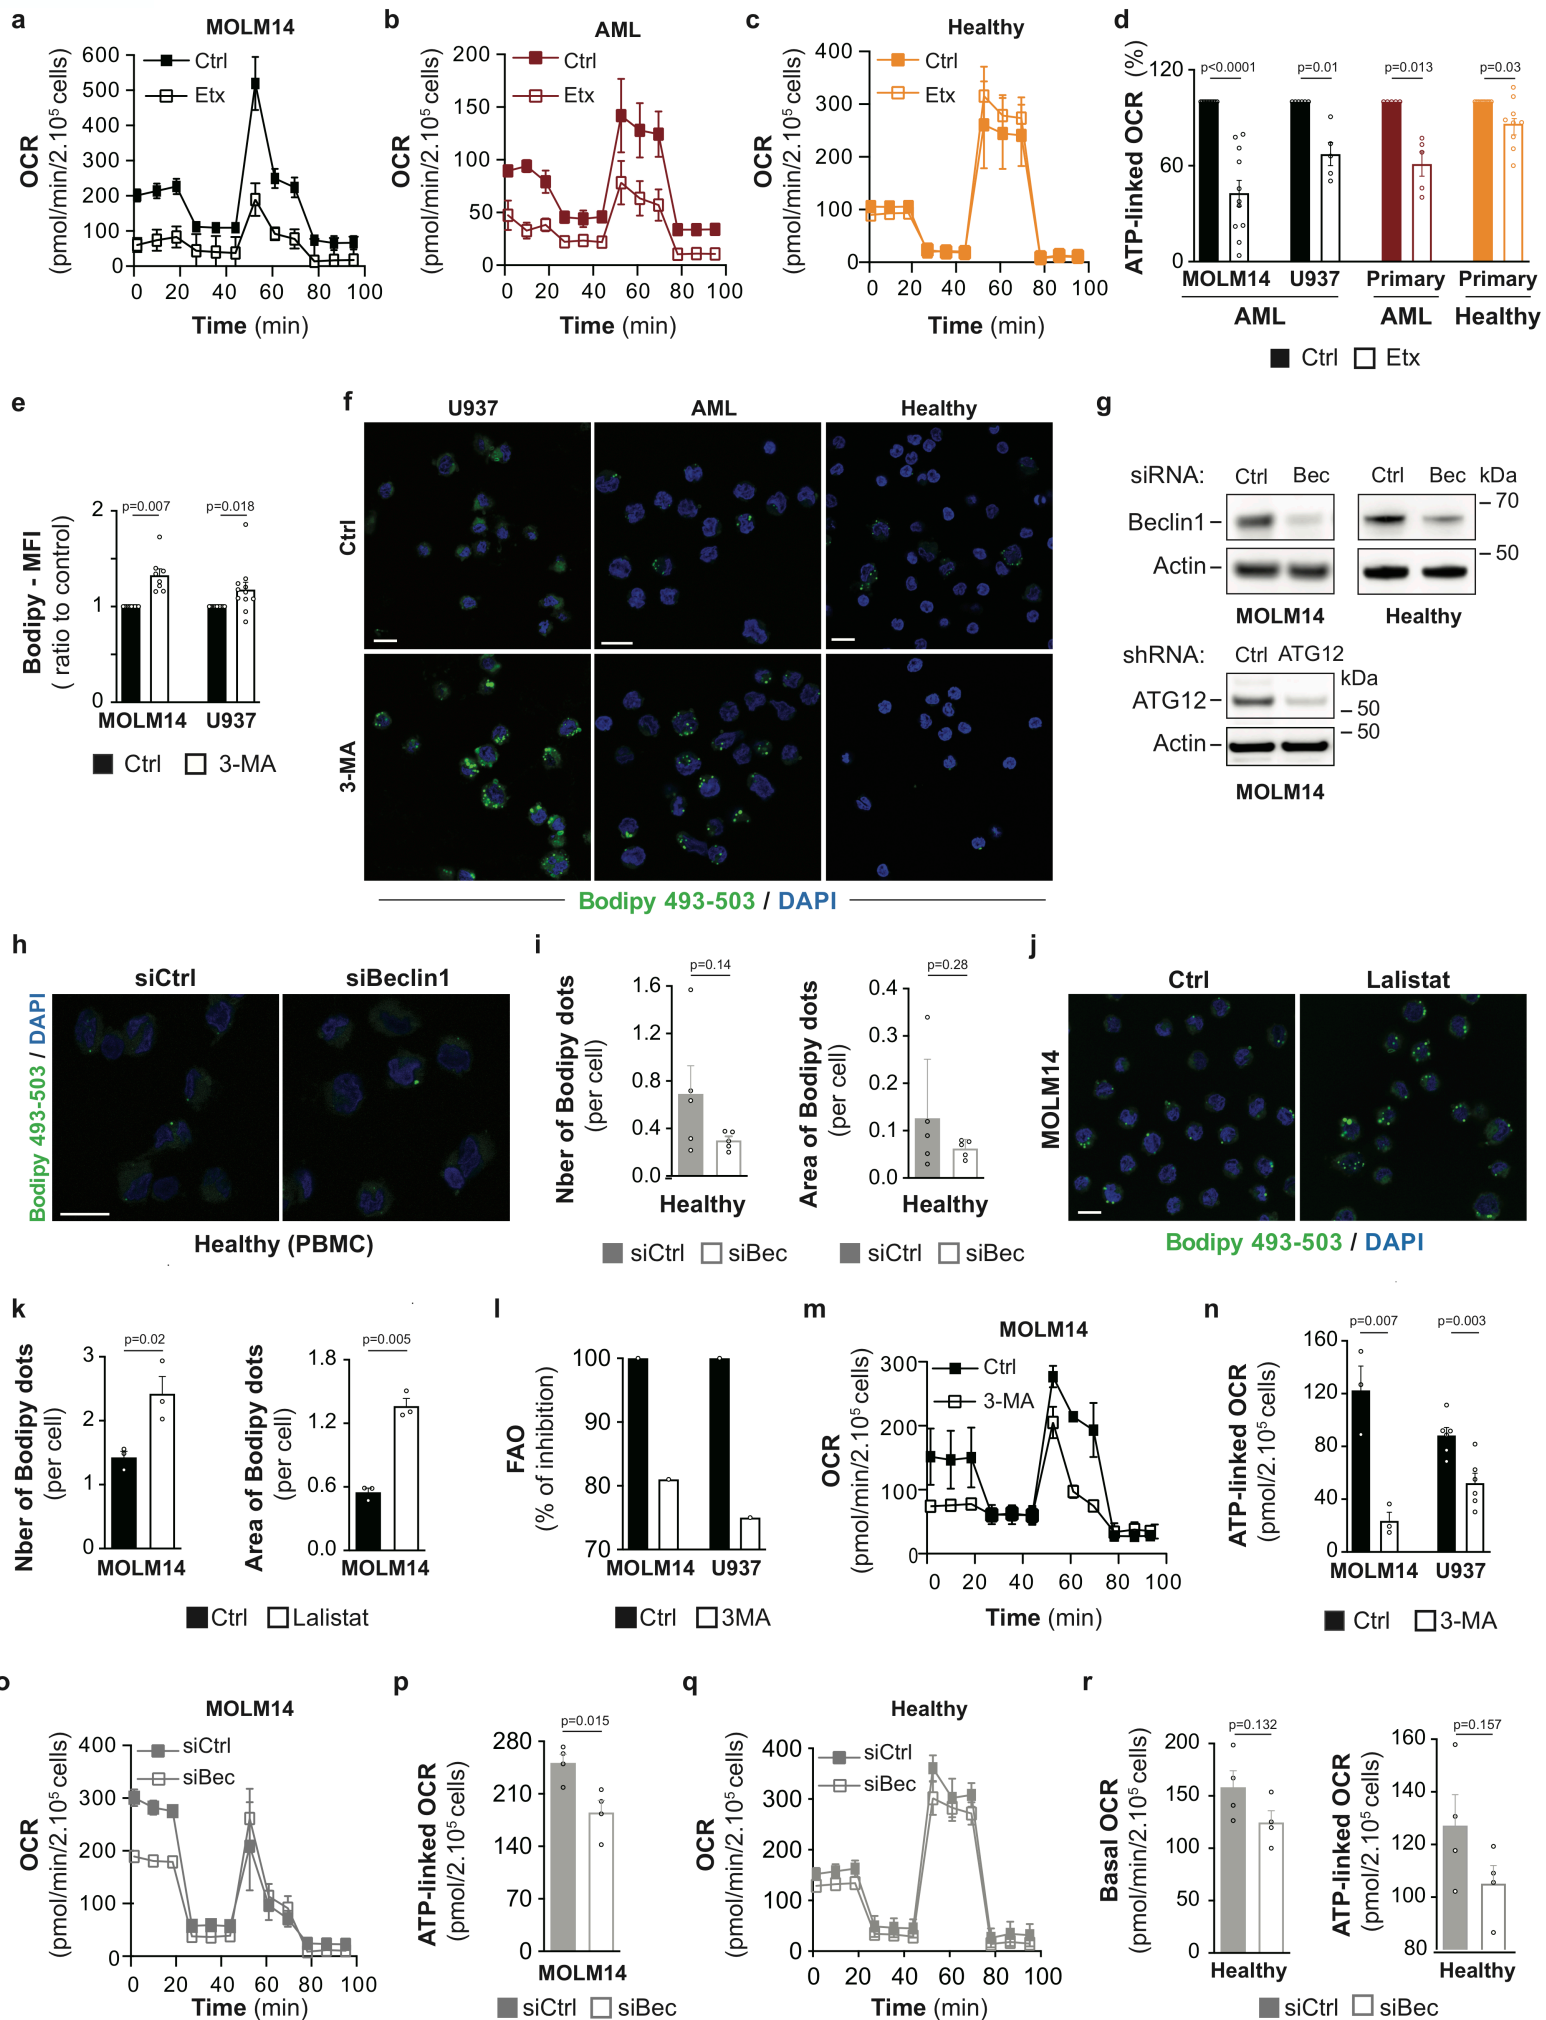

### Supplementary Figure 1. Autophagy participates to lipid catabolism to support OxPHOS.

**a-c.** Data of mitochondrial respiration in MOLM14 (**a**), AML (**b**) and normal hematopoietic cells (**c**) +/- Etomoxir (Etx). **d.** Seahorse measurement of ATP-linked OCR in MOLM14 (n=11) and U937 (n=5), AML patient (n=5) and normal hematopoietic cells (PBMC n=6; CD34+ n=3) +/- Etx (One sample t test). **e.** MOLM14 and U937 cells +/- 3-methyladenine (3-MA), stained for Bodipy 493/503, and analyzed by flow cytometry, (n=8 for MOLM14 and n=11 for U937, One sample t test). **f.** U937, AML patient, and normal hematopoietic cells +/- 3-MA were stained for Bodipy 493/503 and DAPI. Confocal pictures from at least 3 independent experiments are shown. Scale bar: 10 $\mu$ m. **g.** Western blots, from at least 3 independent experiments, showing ATG12 and Beclin1 expression after Ctrl, ATG12 or Beclin1 siRNA transfections in MOLM14 and in normal hematopoietic cells. **h.** Confocal pictures from at least 3 independent experiments of normal hematopoietic cells (PBMC) transfected with Ctrl or Beclin1 siRNAs and stained for Bodipy 493/503 and DAPI. Scale bar: 10 $\mu$ m. **i.** Histograms show the number or the area of Bodipy dots per cell. (n=5, Paired t test). **j.** Confocal pictures from 3 independent experiments of MOLM14 treated with Lalistat2 and stained for Bodipy 493/503. **k.** Histograms show the number or the area of Bodipy dots per cell. (n=3, Unpaired t test.). **l.** MOLM14 and U937 cells +/- 3-MA were examined for their rates of fatty acid  $\beta$ -oxidation (FAO). Data are means of triplicates. **m.** Data of mitochondrial respiration in MOLM14 cells +/- 3-MA. **n.** Seahorse measurement of ATP-linked OCR in MOLM14 (n=3) and U937 (n=6) +/- 3-MA (Unpaired t test). **o.** Data of mitochondrial respiration in MOLM14 cells after Ctrl or Beclin1 siRNA transfections. **p.** Seahorse measurement of ATP-linked OCR in MOLM14 cells after Ctrl or Beclin1 siRNA transfections. (n=4, Unpaired t test.). **q.** Data of mitochondrial respiration in primary normal hematopoietic cells (PBMC) after Ctrl or Beclin1 siRNA transfections. **r.** Seahorse measurements of basal OCR and ATP-linked OCR in normal hematopoietic cells (PBMC) after Ctrl or Beclin1 siRNA transfections (Paired t test). Data are means  $\pm$  s.e.m.



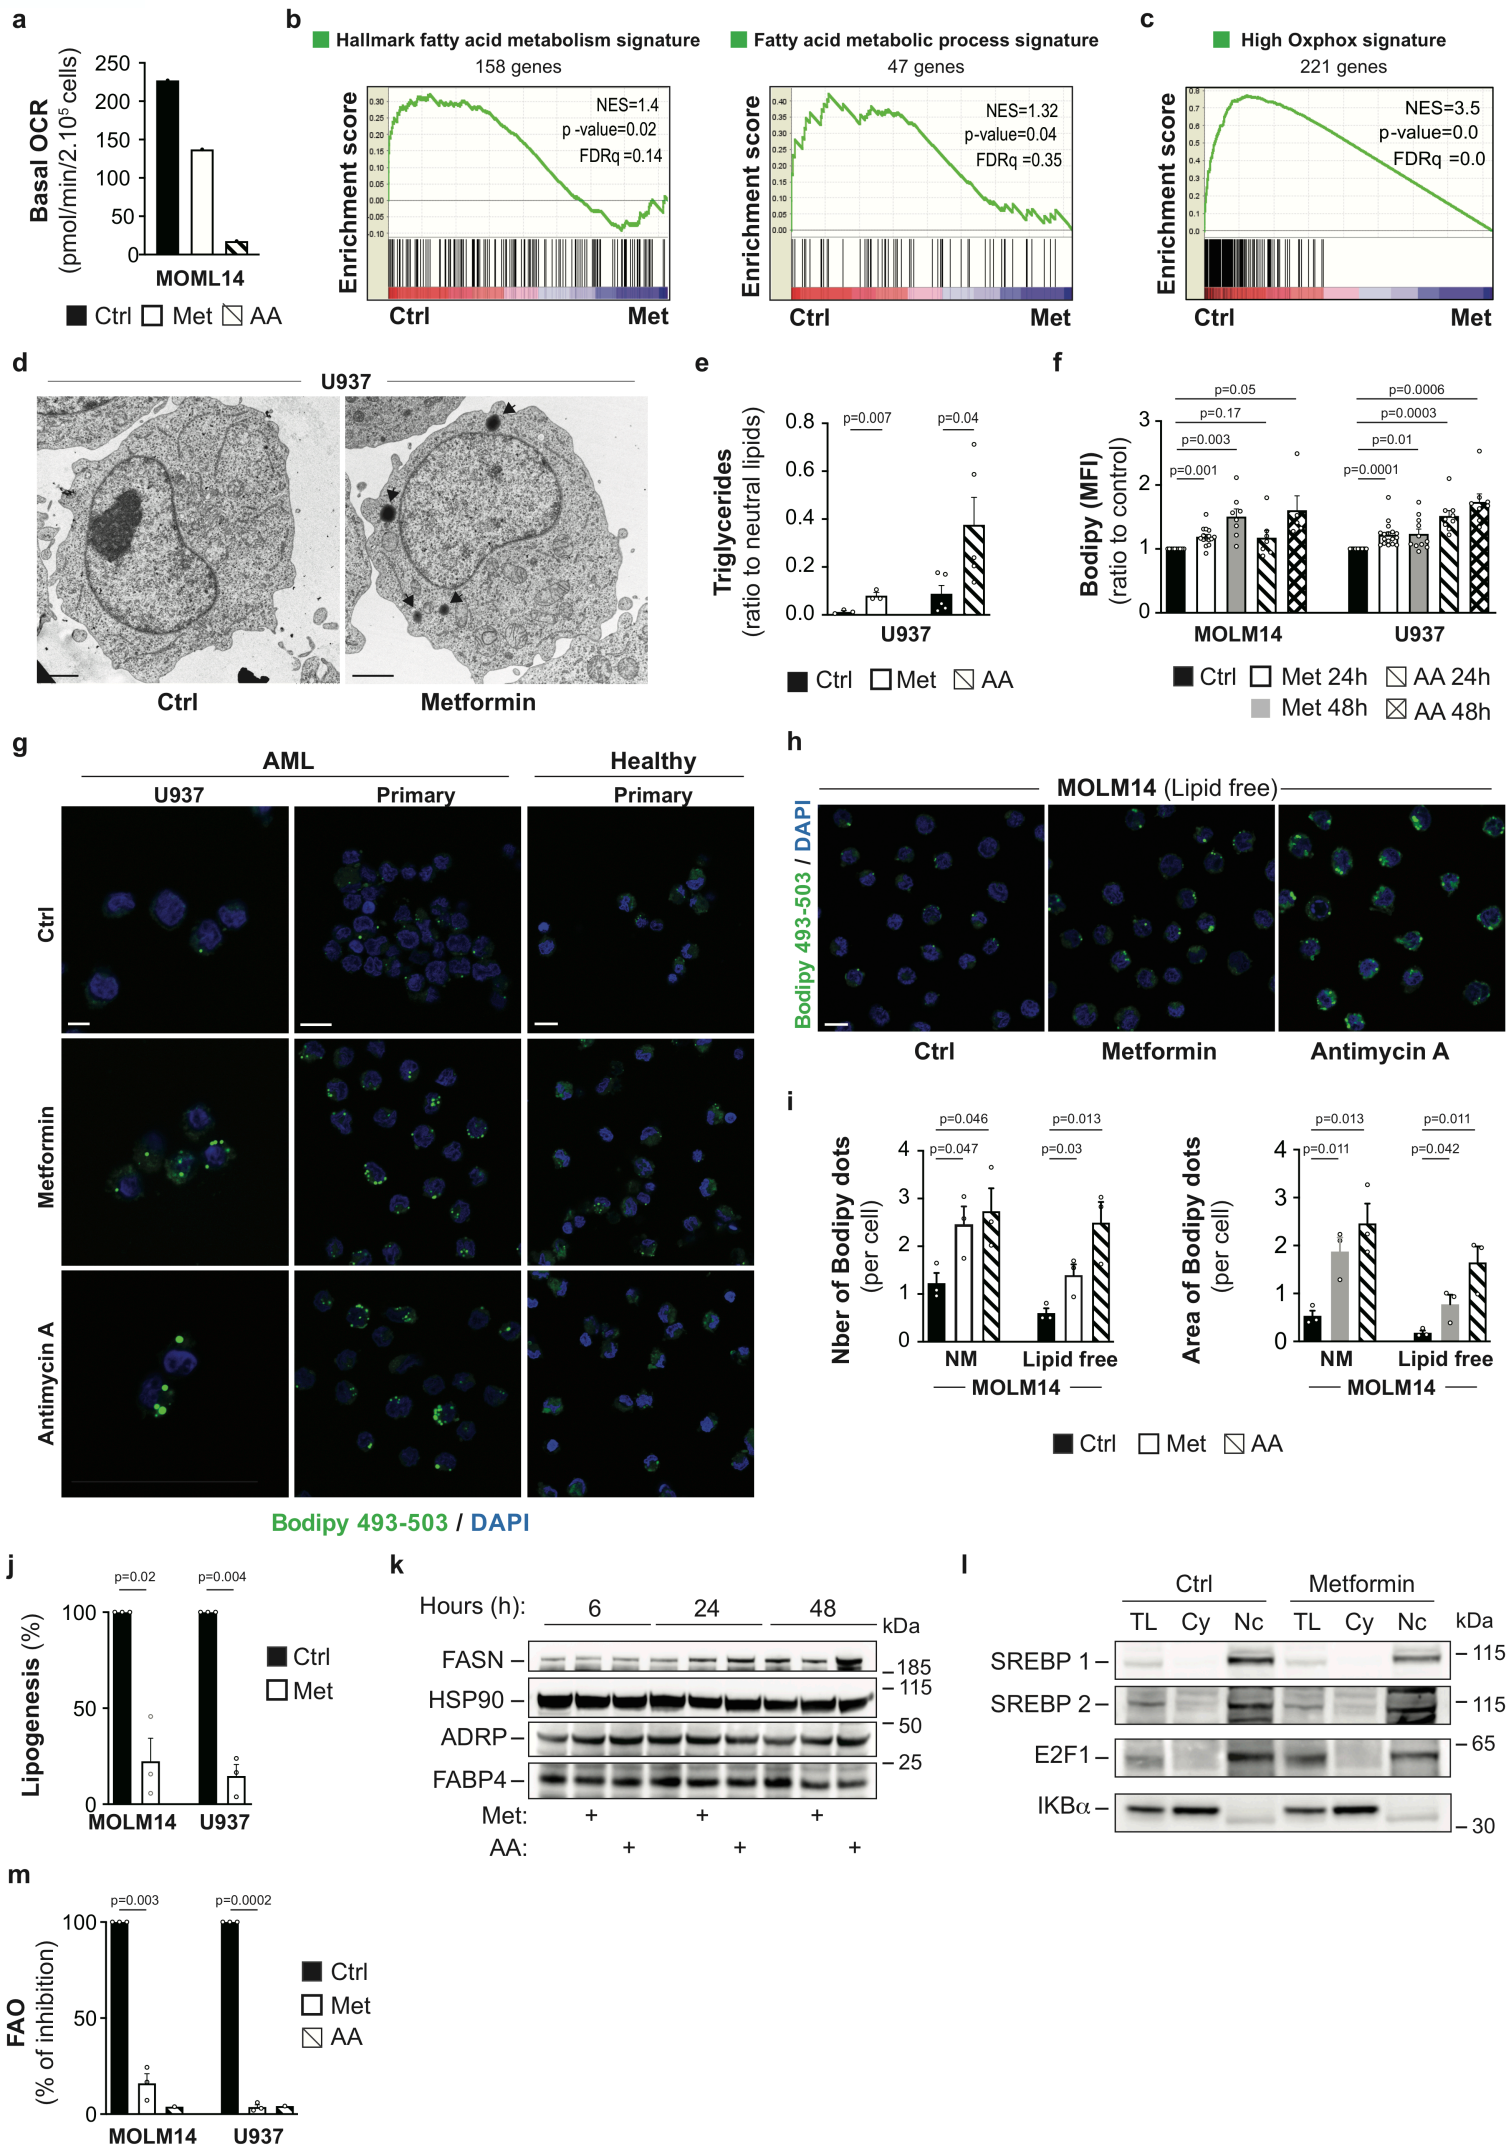

## Supplementary Figure 2. Inhibition of OxPHOS affects lipid metabolism.

**a.** Basal OCR in MOLM14 cells after metformin (Met) or antimycin A (AA) treatment for 24h. **b,c.** Gene Set Enrichment Analysis (GSEA) of fatty acid metabolism identified signatures<sup>28</sup> (**b**) and of High OxPHOS signature<sup>18</sup> (**c**) were performed using transcriptomes of MOLM14 and U937 cells treated or not with metformin shown in Fig. 2a,b. (Kolmogorov-Smirnov test). **d.** U937 cells treated with metformin and processed for electron microscopy analysis. Representative electron microscopy pictures from 2 independent experiments are shown. Arrows indicate lipid droplets. Scale bar:2 $\mu$ m. **e.** U937 cells were treated with Met (n=3) or with AA (n=5) and processed for triglyceride content analysis (Unpaired t test). **f.** MOLM14 and U937 cells were treated or not with metformin (Met) or antimycin A (AA) for 24 and 48h, subsequently stained for Bodipy 493/503 and analysed by flow cytometry. (at least n=5 for MOLM14 and at least n=8 for U937, One sample t test). **g.** U937, primary AML patient and normal hematopoietic cells +/- met or AA, fixed and stained for Bodipy 493/503 and DAPI. Representative confocal pictures from at least 3 independent experiments are shown. Scale bar:10 $\mu$ m. **h,i.** MOLM14 cells were treated or not with met or AA in serum-free medium, fixed and stained for Bodipy 493/503 and DAPI. Representative confocal pictures from 3 independent experiments are shown. Scale:10  $\mu$ m, (**h**). Histograms show the number or the area of Bodipy dots per cell. (n=3, Unpaired t test), (**i**). **j.** MOLM14 and U937 cells treated or not with Met were examined for their rates of lipogenesis. (n=3, One sample t test). **k.** Western blots showing FASN, HSP90, ADRP and FABP4 expression in MOLM14 cells treated with Met or AA for the indicated times (2 independent experiments). **l.** MOLM14 cells were treated with metformin for 48h and subjected to subcellular fractionation and western blot analysis for SREBP1, SREBP2, E2F1 and IKB $\alpha$ . TL:total lysate; Cy:cytosol; Nc:nucleus. (2 independent experiments). **m.** MOLM14 and U937 cells treated or not with Met (n=3) or AA (n=1) were examined for their rates of fatty acid  $\beta$ -oxidation (One sample t test).

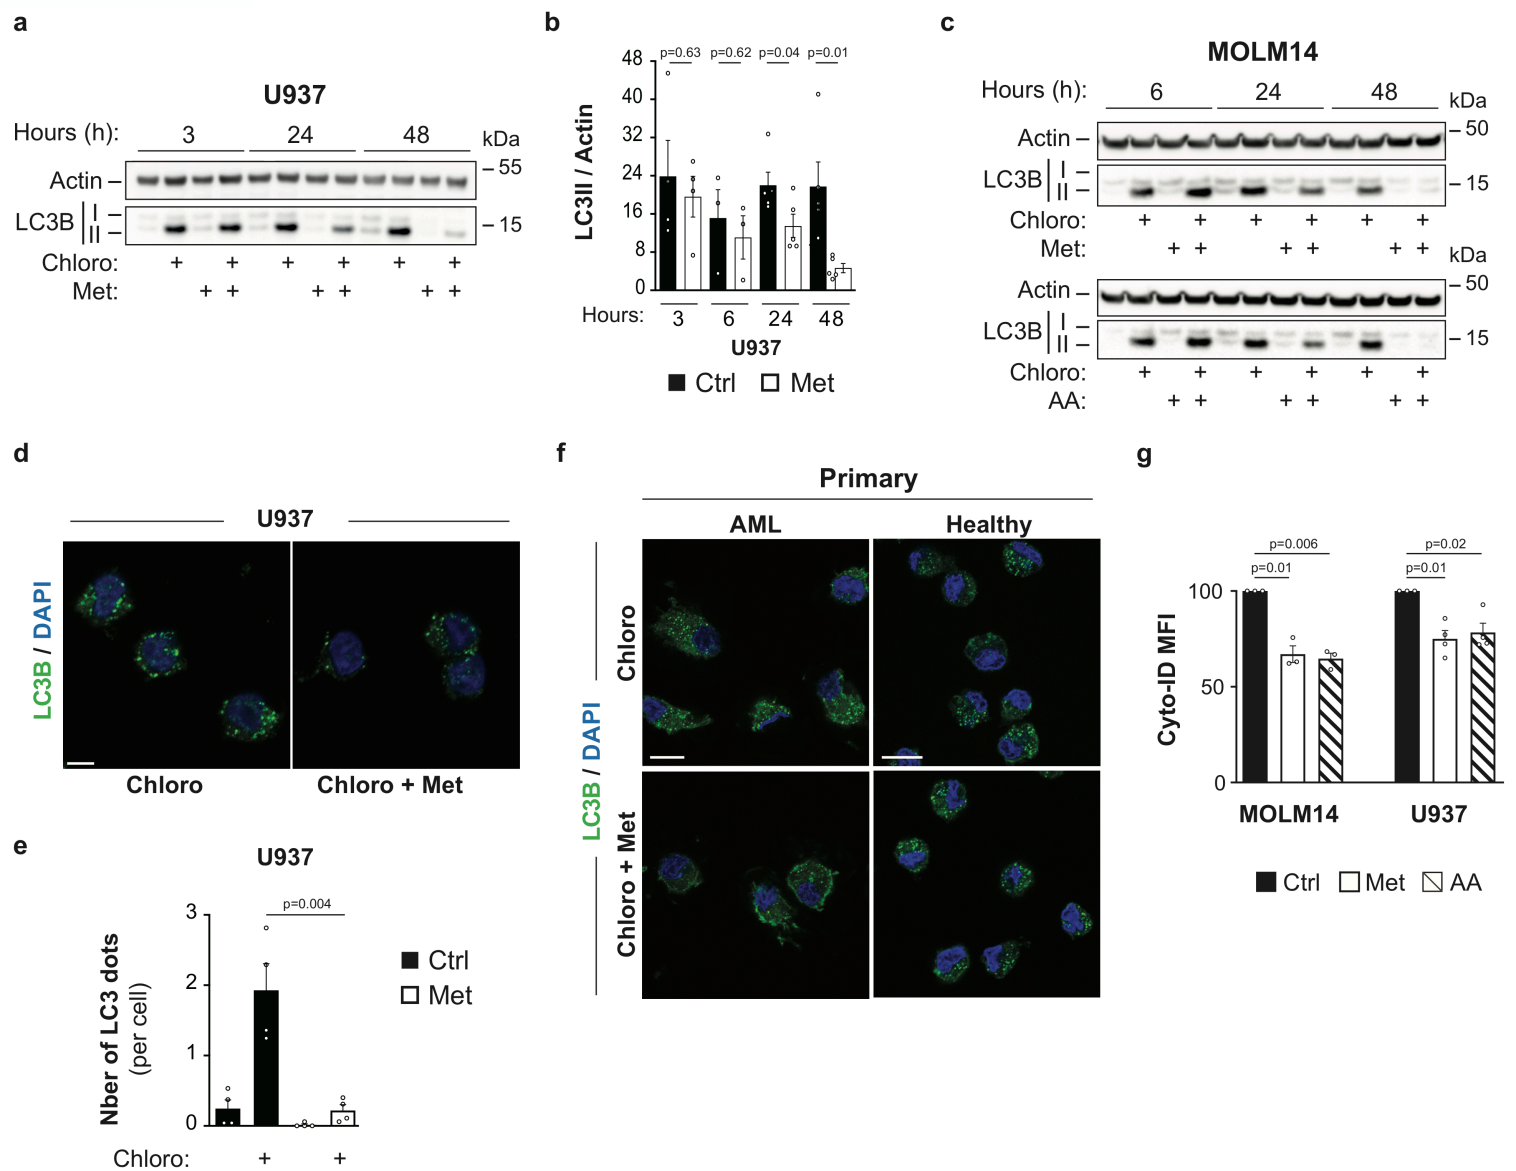

### Supplementary Figure 3. Inhibition of OxPHOS reduces autophagic flux.

**a.** Western blots of LC3B and actin from U937 cells treated with metformin (Met) in presence or not of chloroquine (chloro) for the indicated times are shown (at least from 3 independent experiments). **b.** LC3B-II / actin ratios measured by densitometries from Western blots shown in **a.** (at least  $n=3$ , Unpaired t test.). **c.** Western blots of LC3B and actin from MOLM14 treated with metformin (Met) or antimycin A (AA) +/- chloroquine for the indicated times are shown (from at least 3 independent experiments). **d,e.** U937 cells were treated or not with metformin (Met) for 48h in presence or not of chloroquine (chloro), fixed, and stained for LC3B and DAPI. Representative confocal pictures from 4 independent experiments are shown. Scale bar:  $10\mu\text{m}$  (d). Histograms represent the number of LC3B puncta per cell (e), ( $n=4$ , Unpaired t test). **f.** Primary AML patient cells and normal hematopoietic cells (PBMC) were treated +/- metformin and stained for LC3B and DAPI. Representative confocal pictures from at least 5 independent experiments are shown. Scale:  $10\mu\text{m}$ . **g.** MOLM14 ( $n=3$ ) and U937 ( $n=4$ ) cells were treated with metformin or antimycin A for 48h and stained with Cyto-ID before flow cytometry analysis (One sample t test).

Data are means  $\pm$  s.e.m.

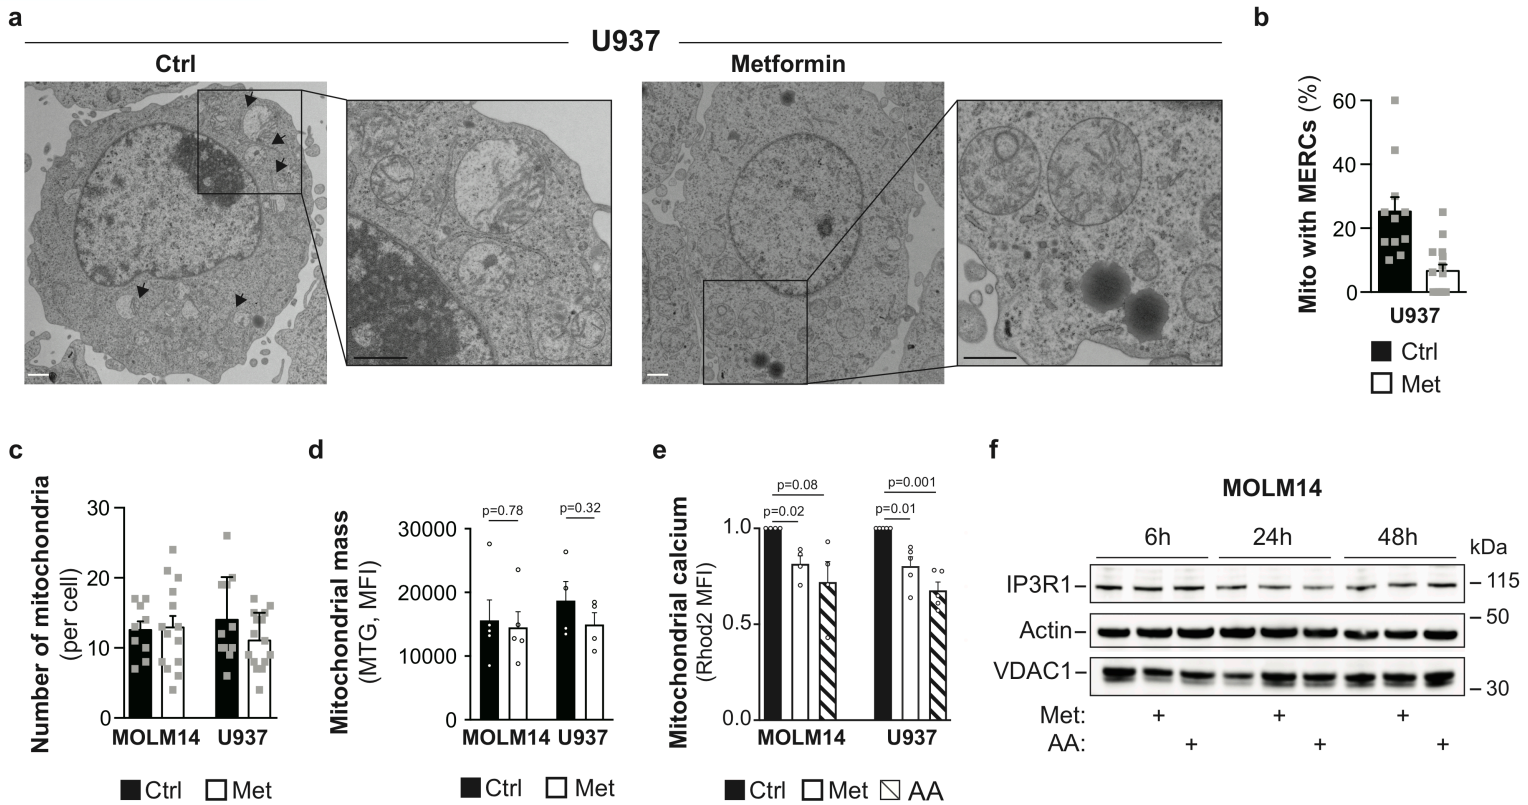

#### Supplementary Figure 4. OxPHOS regulates MERCs number and function.

**a.** U937 cells treated with metformin for 24h were processed for electron microscopy analysis. Representative electron microscopy pictures from 2 independent experiments are shown. Arrows indicate MERCs. Scale bar: 1 $\mu$ m. **b.** Histograms represent the % of mitochondria that are in contact with endoplasmic reticulum per cell treated or not with metformin from pictures obtained in (a). Data are means  $\pm$  s.e.m with each dot corresponding to one cell. **c.** Histograms represent the number of mitochondria per cell treated or not with metformin from pictures obtained in (a). **d.** MOLM14 and U937 cells treated with metformin for 24h were stained with MitoTracker<sup>TM</sup> Green FM (MTG) to determine mitochondrial mass by flow cytometry analysis. (MOLM14 n=5; U937 n=4, Unpaired t test). **e.** MOLM14 and U937 cells treated with metformin (Met) or antimycin A (AA) for 24h were stained with Rhod2 to determine mitochondrial calcium by flow cytometry analysis (MOLM14 n=4; U937 n=5, Unpaired t test). **f.** Western blots of IP3R1, VDAC1 and actin from MOLM14 treated with metformin (Met) or antimycin A (AA) for the indicated times are shown (from 2 independent experiments).



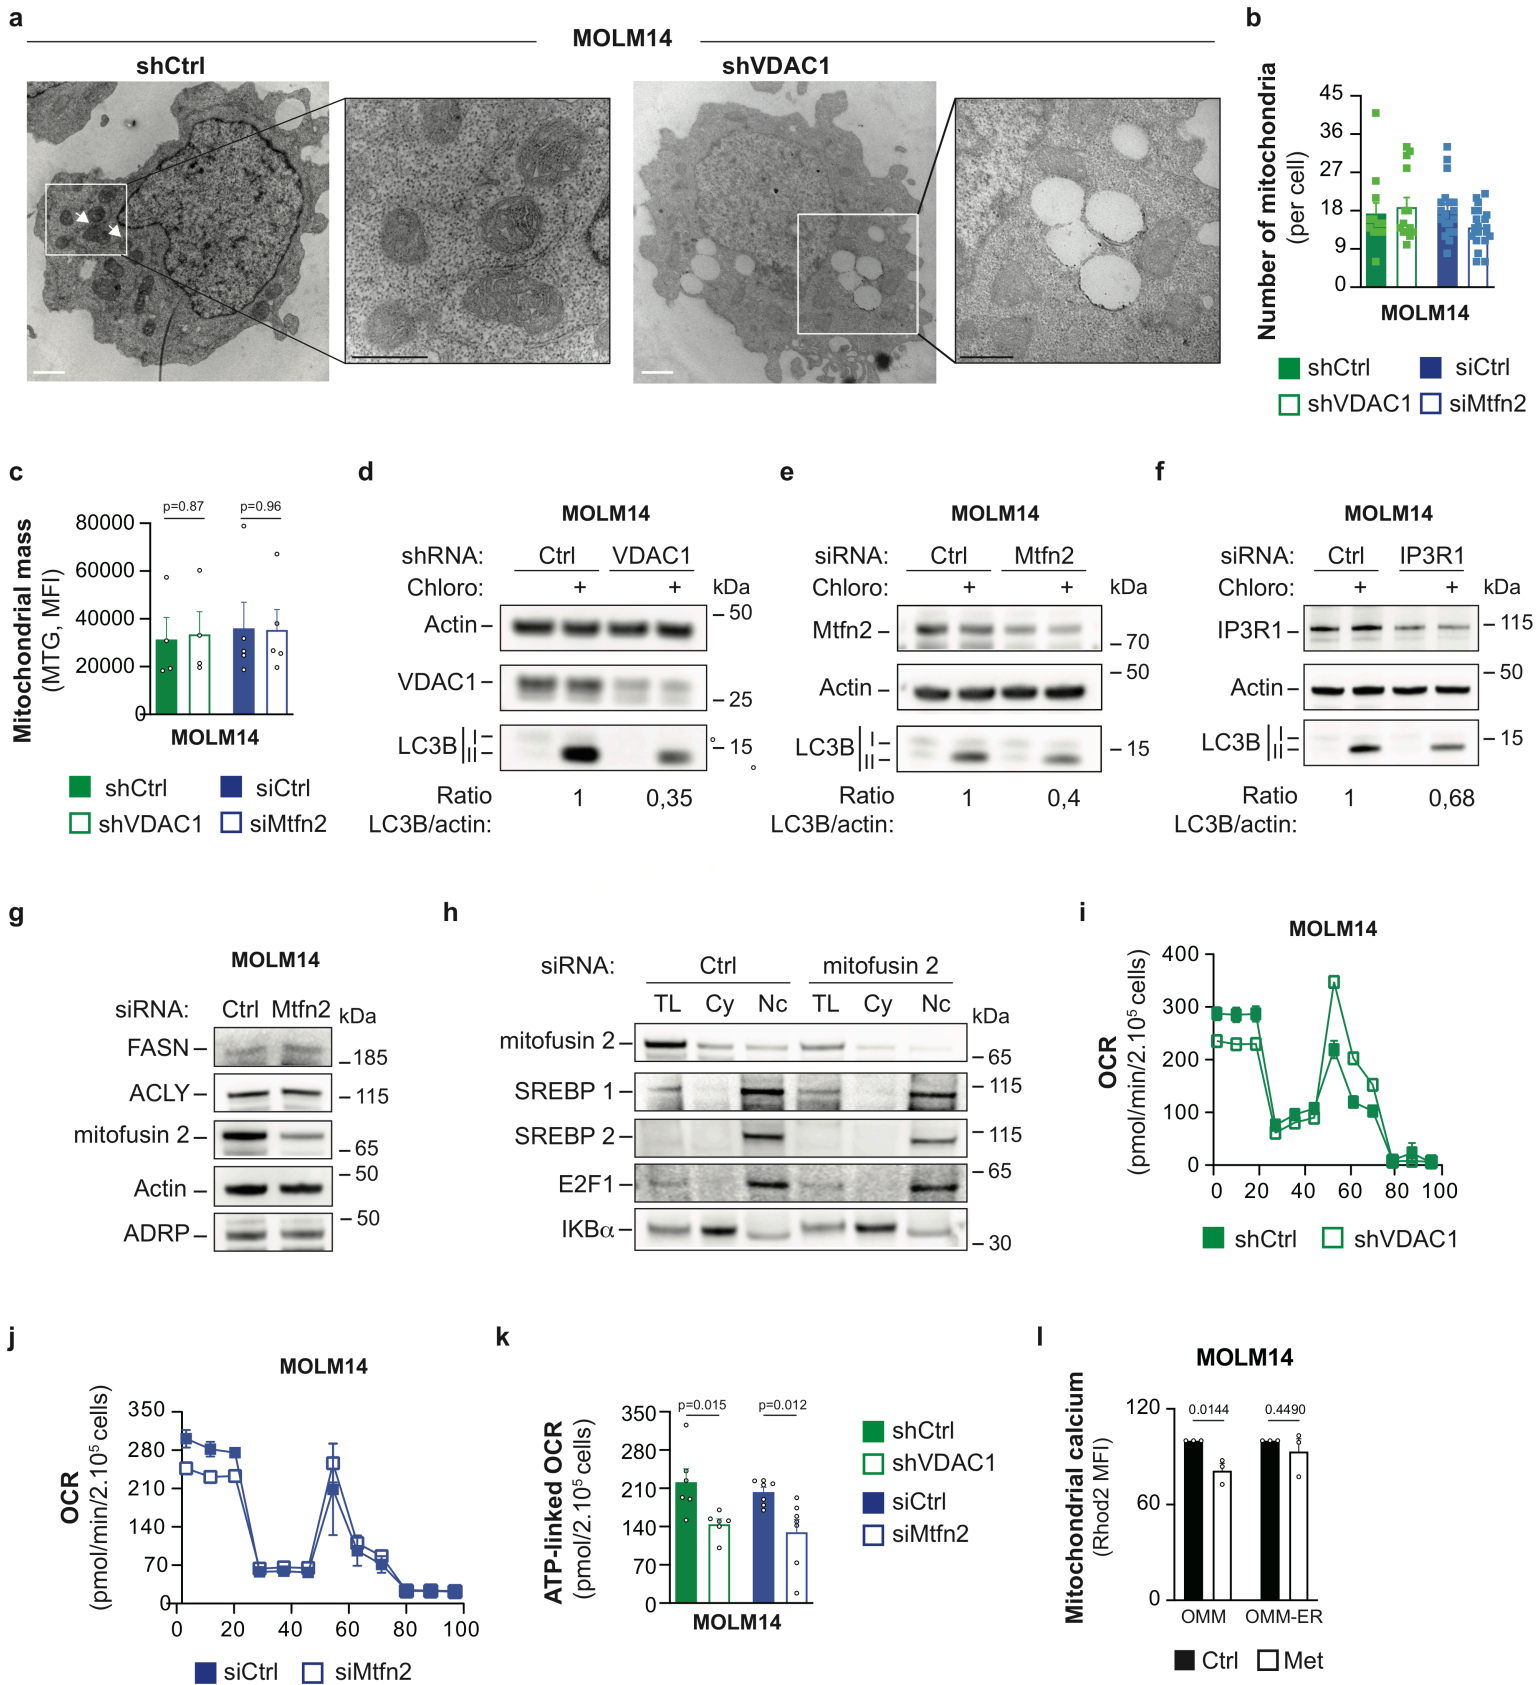

**Supplementary Figure 5. MERCs regulate lipid degradation through autophagy to sustain OxPHOS.**

**a.** MOLM14 cells transduced with Ctrl or VDAC1 shRNAs +/- metformin processed for electron microscopy analysis. Electron microscopy pictures (1 experiment) are shown. Arrows indicate MERCs. Scale bar: 1  $\mu$ m. **b.** Histograms represent the number of mitochondria per MOLM14 cell transduced with Ctrl or VDAC1 shRNAs obtained in **(a)** or per MOLM14 cell transfected with control (Ctrl) or mitofusin 2 (Mfn2) siRNAs obtained in **Fig. 5a**. **c.** MOLM14 cells transduced with Ctrl or VDAC1 shRNAs (n=4) or transfected with Ctrl or Mfn2 siRNAs (n=5) were stained with MitoTracker™ Green FM (MTG) to determine mitochondrial mass by flow cytometry (Unpaired t test). **d.** Western blots showing VDAC1, LC3B and actin expression after Ctrl or VDAC1 shRNA transduction in MOLM14 cells +/- chloro. Numbers indicate the ratio of LC3B/actin (2 independent experiments). **e.** Western blots showing Mfn2, LC3B and actin expression after Ctrl or Mfn2 siRNA transfections in MOLM14 cells +/- chloro. Numbers indicate the ratio of LC3B/actin (2 independent experiments). **f.** Western blots showing IP3R1, LC3B and actin expression after Ctrl or IP3R1 siRNA transfections in MOLM14 cells +/- chloro. Numbers indicate the ratio of LC3B/actin (1 experiment). **g.** Western blots of the fatty acid synthase (FASN), ATP citrate synthase (ACLY), Mfn2, adipophilin (ADRP) and actin after Ctrl or Mfn2 siRNA transfections in MOLM14 cells (2 independent experiments). **h.** MOLM14 cells transfected with Ctrl or Mfn2 siRNAs were treated with metformin and subjected to subcellular fractionation and western blot analysis for Mfn2, SREBP1, SREBP2, E2F1 and IKB $\alpha$ . TL: total lysate; Cy: cytosol; Nc: nucleus. (2 independent experiments). **i,j.** Data of mitochondrial respiration after Ctrl or VDAC1 shRNA transduction (**i**) or Ctrl or Mfn2 siRNA transfections (**j**) in MOLM14 cells. **k.** Measurement of ATP-linked OCR in MOLM14 cells transduced with Ctrl or VDAC1 shRNAs (n=6) or transfected with Ctrl or Mfn2 siRNAs (n=7) (Unpaired t test). **l.** MOLM14 cells were transduced with the mitochondria-ER organelle linker (OMM-ER) or its control sequence (OMM), treated with metformin and stained with Rhod2 to determine mitochondrial calcium by flow cytometry. (n=3, One sample t test).

Data are means  $\pm$  s.e.m.

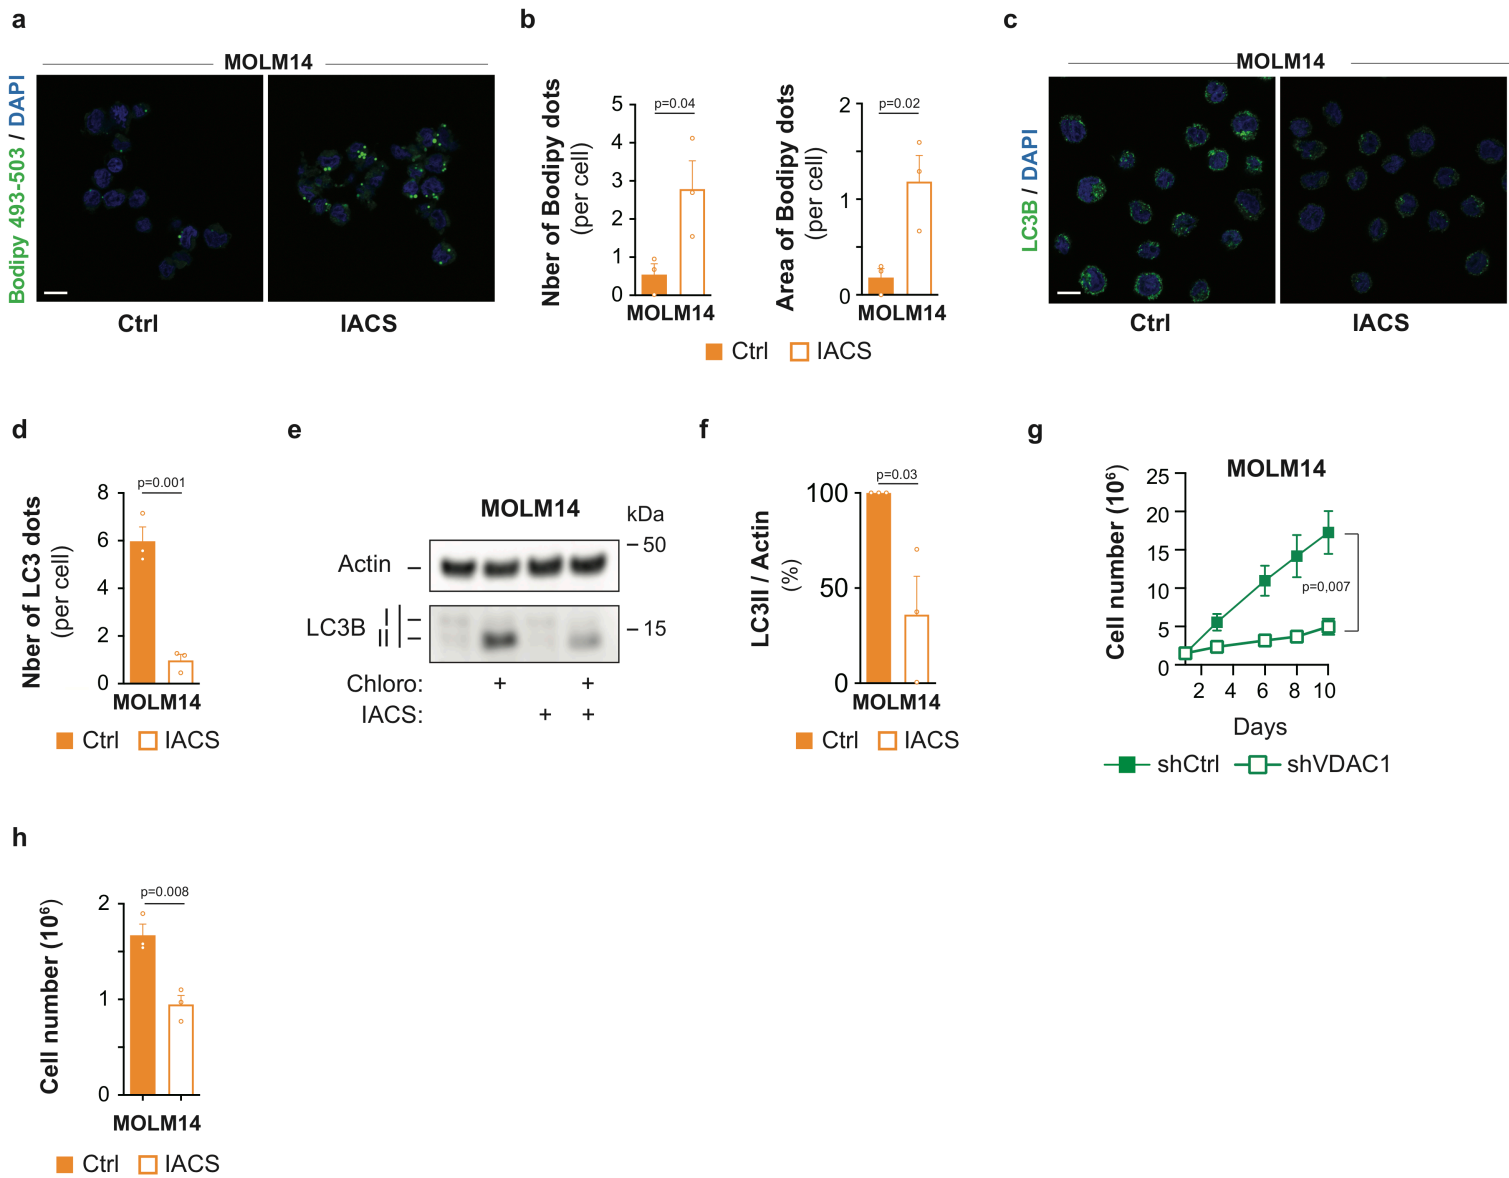

### Supplementary Figure 6. MERCs support the dialogue between autophagy and OxpHOS.

**a.b.** MOLM14 cells were treated or not with IACS-010759 (100nM) for 48h, fixed and stained for Bodipy 493/503 and DAPI. Representative confocal pictures from 3 independent experiments are shown. Scale bar: 10 $\mu$ m (a). Histograms show the number or the area of Bodipy 493/503 dots per cell (b). (n=3, Unpaired t test). **c,d.** MOLM14 cells were treated or not with IACS-010759 (100nM) for 48h, fixed and stained for LC3B and DAPI. Representative confocal pictures from 3 independent experiments are shown. Scale bar: 10 $\mu$ m (c). Histograms show the number of dots per cell (d). (n=3, Unpaired t test). **e,f.** Western blots showing LC3B and actin expression of MOLM14 cells treated or not with IACS-010759 (100nM) for 48h (e) (3 independent experiments). Quantification of western blots (f). (n=3, Unpaired t test). **g.** MOLM14 cells were transduced with Ctrl or VDAC1 shRNAs, and the number of cells was assessed by trypan blue exclusion counting. The graph represents the cumulative number of cells per day. (n=5, Mann Whitney test). **h.** MOLM14 cells were treated or not with IACS-010759 (100nM) for 48h, and the number of cells was assessed by trypan blue exclusion counting (n=3, Unpaired t test).

Data are means  $\pm$  s.e.m.

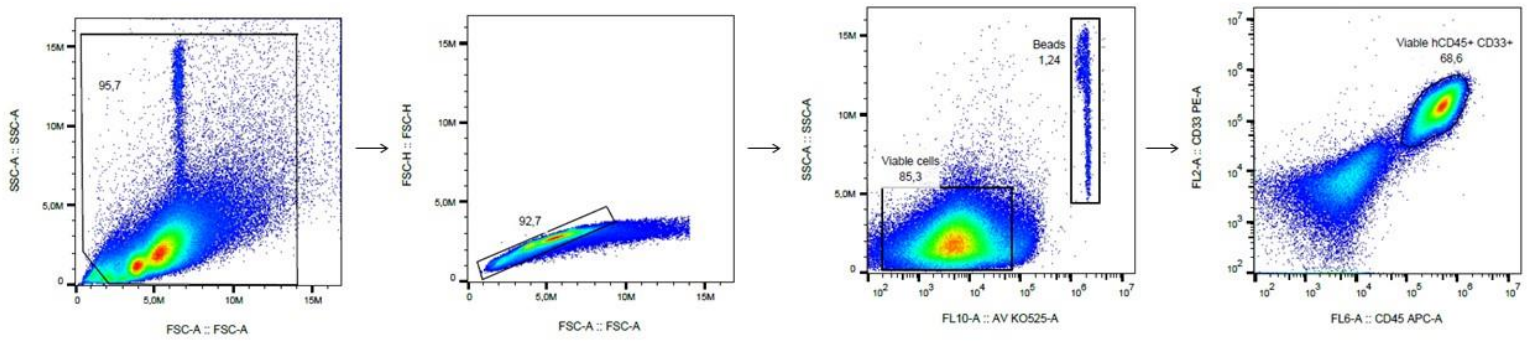

**Supplementary Figure 7. Gating strategy for flow cytometry analysis.**

Cells from the bone marrow compartment of NSG mice are selected according to the forward scatter (FSC) and side scatter (SSC) area (A) parameters. Then, doublet exclusion is performed using height (H) versus area (A) parameters of FSC and live/dead discrimination is applied using annexinV dye. The AML blast population is CD45+CD33+. The tumour burden is determined using the beads and blasts true count.



**Fig. 3a**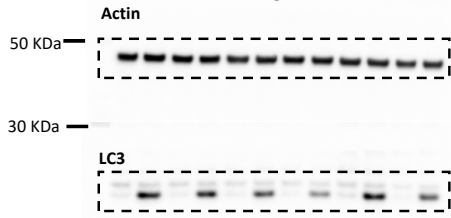**Fig. 3b**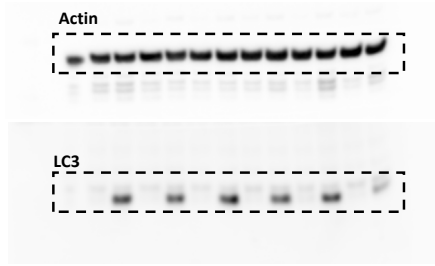**Fig. 3e**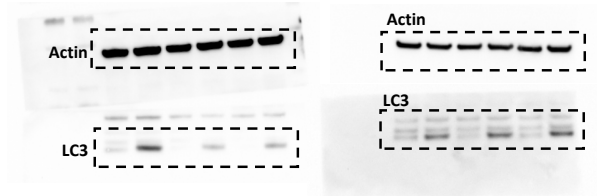**Fig. 4c**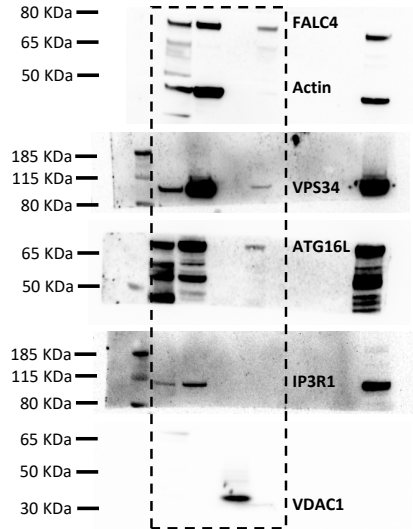**Fig. 5l**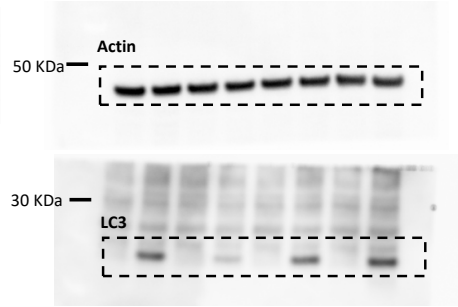**Fig. 6h**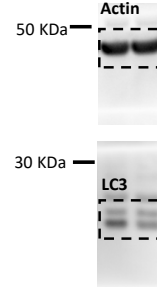**Fig. S1g**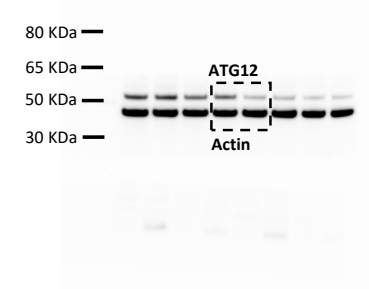**Fig. S2l**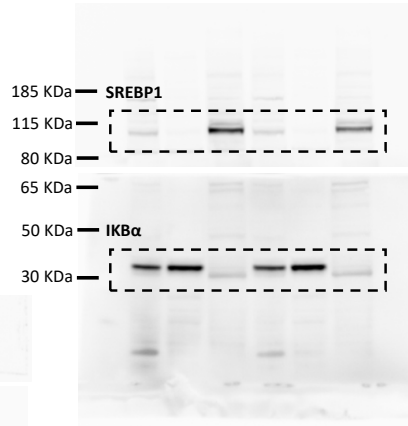**Fig. S2l**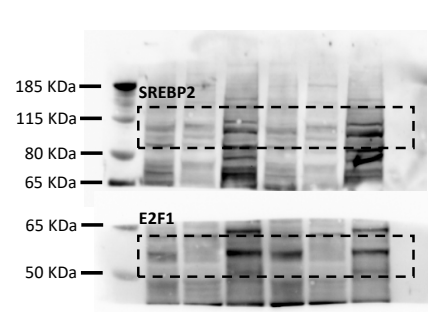**Fig. S1g**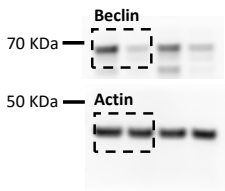**Fig. S1g**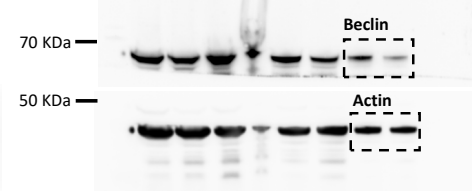**Fig. S2k**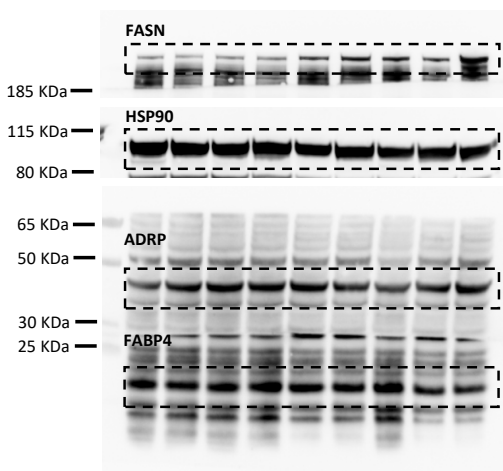**Fig. S3a**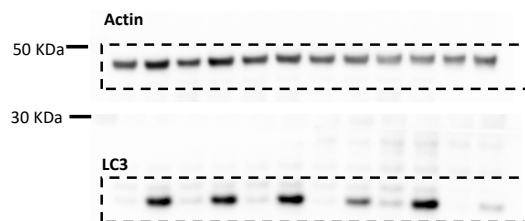

Fig. S3c

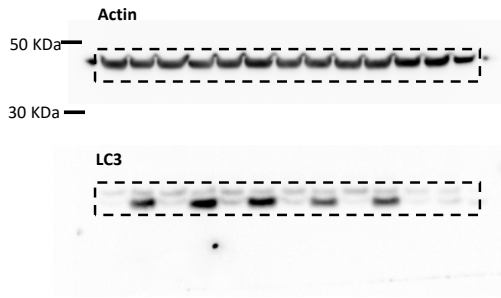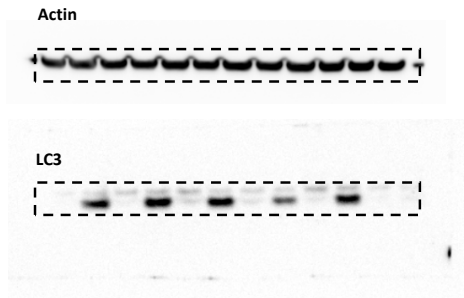

Fig. S5d

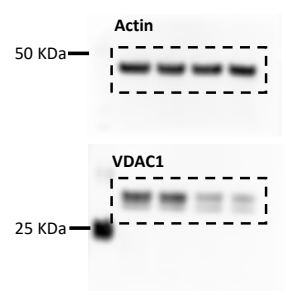

Fig. S4f

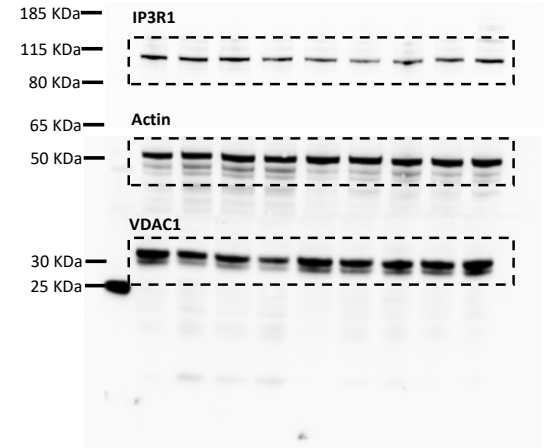

Fig. S5e

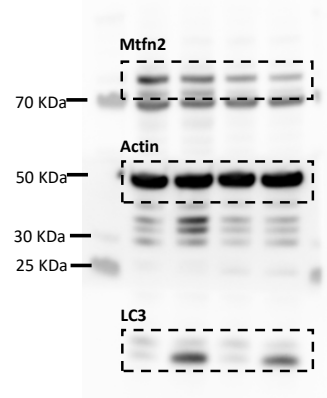

Fig. S5f

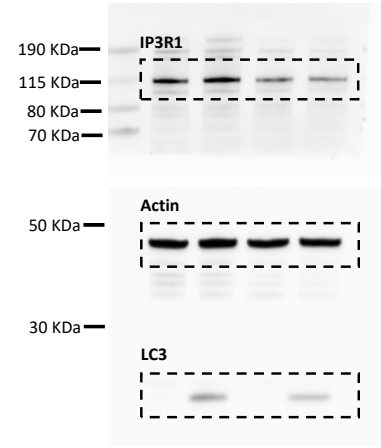

Fig. S5g

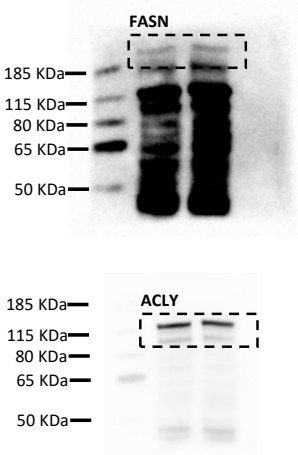

Fig. S5g

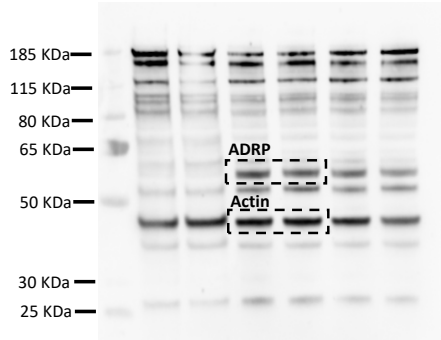

Fig. S5g

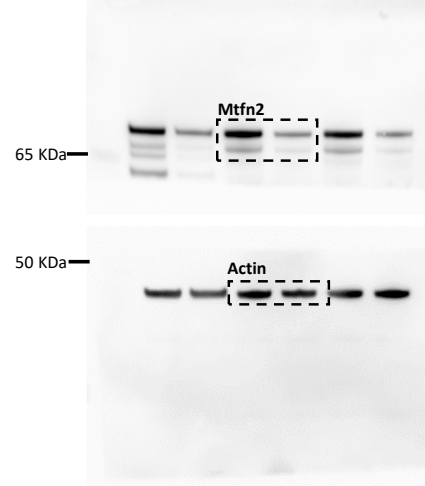

Fig. S6e

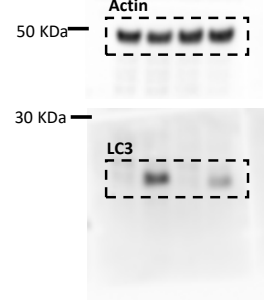

Fig. S5h

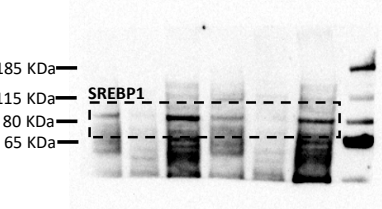

Fig. S5h

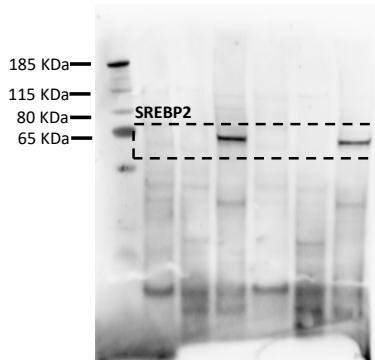

Fig. S5h

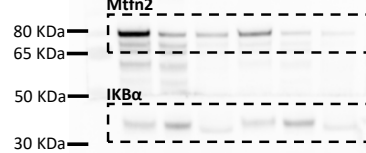

Fig. S5h

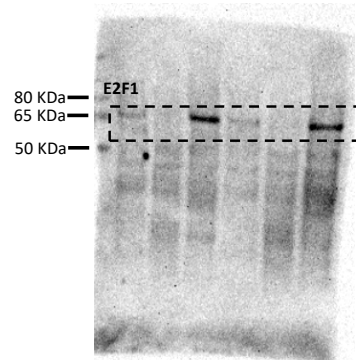

Supplement: 41467_2020_17882_MOESM1_ESM.pdf [file 41467_2020_17882_MOESM1_ESM.pdf]
